# Supplementary material for: GPCRs Direct Germline Development and Somatic Gonad Function in Planarians
Source: PLoS Biol. 2016 May 10;14(5):e1002457. doi: 10.1371/journal.pbio.1002457 (PMC4862687; doi:10.1371/journal.pbio.1002457)
Supplement: S4 Data — (XLSX) [file pbio.1002457.s004.xlsx]

## Sheet: Fig 2C-D
				Developmental features
Experiment	Gene	Clone	RNAi paradigm	Gonopore (live)	Mature testes	Mature ovaries	Sperm in seminal vesicles
1	Control*	n/a	Innate development	5/5	5/5	5/5	5/5
2	Control*	n/a	Innate development	5/5	5/5	5/5	5/5
3	Control*	n/a	Innate development	5/5	5/5	5/5	5/5
1	npyr-1	A45.1	Innate development	2/5	0/5	0/5	0/5
1	npyr-1	A47.1	Innate development	5/5	0/5	0/5	0/5
1	npyr-1	A49.1	Innate development	3/5	0/5	0/5	0/5
2	npyr-1	A45.1	Innate development	1/5	0/5	0/5	0/5
2	npyr-1	A47.1	Innate development	5/5	0/5	0/5	0/5
2	npyr-1	A49.1	Innate development	2/5	0/5	0/5	0/5
1	npyr-2	A17.1	Innate development	5/5	5/5	5/5	5/5
1	npyr-3	A22.1	Innate development	5/5	5/5	5/5	5/5
3	npyr-4	GCR282	Innate development	5/5	5/5	5/5	5/5
1	npyr-5	A07.1	Innate development	5/5	5/5	5/5	5/5
1	npyr-5	A39.1	Innate development	5/5	5/5	5/5	5/5
1	npyr-6	A20.1	Innate development	5/5	5/5	5/5	5/5
1	npyr-6	A25.1	Innate development	5/5	5/5	5/5	5/5
1	npyr-7	A14.1	Innate development	5/5	5/5	5/5	5/5
1	npyr-8	A03.1	Innate development	5/5	5/5	5/5	5/5
1	npyr-9	A30.1	Innate development	5/5	5/5	5/5	5/5
1	npyr-9	A35.1	Innate development	5/5	5/5	5/5	5/5
1	npyr-10	A32.2	Innate development	5/5	5/5	5/5	5/5
1	npyr-10	A43.1	Innate development	5/5	5/5	5/5	5/5
1	npyr-11	A11.1	Innate development	5/5	5/5	5/5	5/5
1	npyr-11	A19.1	Innate development	5/5	5/5	5/5	5/5
1	npyr-12	A41.1	Innate development	5/5	5/5	5/5	5/5
1	npyr-13	A40.1	Innate development	5/5	5/5	5/5	5/5
1	npyr-14	A26.1	Innate development	5/5	5/5	5/5	5/5
1	npyr-15	A05.1	Innate development	5/5	5/5	5/5	5/5
1	npyr-16	A29.2	Innate development	5/5	5/5	5/5	5/5
* Bacterial ccdB and camR-containing insert of pJC53.2

## Sheet: Fig 3B
				RLUs in Time (s) - peptide administration at 0 sec; 0.1% Triton X-100 administration at 30 sec
Sample	[compound] (M)	Receptor	Day	00:00:00	00:01:00	00:02:00	00:03:00	00:04:00	00:05:00	00:06:00	00:07:00	00:08:00	00:09:00	00:10:00	00:11:00	00:12:00	00:13:00	00:14:00	00:15:00	00:16:00	00:17:00	00:18:00	00:19:00	00:20:00	00:21:00	00:22:00	00:23:00	00:24:00	00:25:00	00:26:00	00:27:00	00:28:00	00:29:00	00:30:00	00:40:10	00:41:10	00:42:10	00:43:10	00:44:10	00:45:10	00:46:10	00:47:10	00:48:10
Cell medium	0	NPYR-1	1	304970	151970	39000	17520	18620	19530	16940	14530	13510	12350	10550	9470	8320	7500	6640	6140	5450	4570	3890	3300	3070	2880	2920	2920	3030	3070	3080	3290	3450	3440	3190	14107690	8277300	4514740	2761350	1924270	1410730	1076240	856900	750590
ATP	1e-06	NPYR-1	1	42220	48660	100150	725470	2186040	3458120	3735400	3297500	2631920	2011920	1524500	1179310	937890	777050	685770	644570	637010	639390	646270	653120	650900	640890	619710	593910	559450	524690	488830	451410	420010	389240	364450	5924580	3358250	1894400	1288360	983600	759580	563820	430210	347420
NPY-8	1e-05	NPYR-1	1	290940	150510	82110	150890	229580	258690	253330	231170	201880	171230	143100	123480	112750	102920	96670	93390	89380	86220	83860	81190	78790	76550	72090	67080	61720	55580	50190	46420	43540	40420	37540	13533700	7242480	4046820	2795580	2157010	1659770	1322870	1067010	854800
NPY-8	1e-05	NPYR-1	1	219730	105130	56390	120430	201970	244070	249060	219580	181080	149750	129910	119240	105370	93080	85230	80580	78440	75770	73710	71120	67400	63680	60990	57160	53110	49130	44810	40300	36240	32640	29370	12198400	6200970	3646640	2625990	2018120	1605470	1315480	1030380	799760
Cell medium	0	NPYR-1	1	92690	42900	14550	10670	9060	7390	4840	3840	4170	4700	4550	3790	3060	2580	2290	2350	2360	2070	1920	2000	2090	2160	2140	2080	1840	1630	1550	1880	1740	1580	1360	4837120	3107160	2060020	1486400	1068280	758330	535760	410250	318980
ATP	1e-06	NPYR-1	1	85100	31760	8850	12150	39790	95390	158900	202720	209440	187520	151930	118640	91680	73660	64740	64270	69850	81180	94570	108490	120340	129250	132800	131550	127370	120910	115390	109620	106000	102760	100410	4517860	3049180	2099540	1767890	1402340	1164010	896030	706920	554180
NPY-8	1e-05	NPYR-1	1	55740	27650	76320	187890	245570	244840	214690	171280	135350	107100	87710	73630	65640	61080	58220	56490	55970	55430	54070	52550	50970	48100	45300	42040	38100	34300	31010	28120	26240	23830	22140	3848360	2100810	1256120	856810	563000	445040	329650	234400	180110
NPY-8	1e-05	NPYR-1	1	75690	56760	110550	273390	349080	322940	259200	201610	158050	129300	108280	93410	85550	82710	82560	84530	86780	85000	81320	75870	69220	63610	57580	52440	47510	42740	38960	34990	32100	29600	27010	3673280	2402670	1680880	1380180	1066810	773360	562640	435790	341200
Cell medium	0	NPYR-1	1	393000	204610	56170	42350	39610	31370	24790	20730	19060	17330	15670	15890	16280	15530	15330	15520	16500	19620	20430	20220	20210	20870	21660	22460	21940	20940	20070	18610	17210	16010	14780	17973510	9214100	5225300	3709170	2864770	2269290	1780090	1367660	1036550
ATP	1e-06	NPYR-1	1	266890	146610	905080	4529610	7739240	7418210	5553750	3779440	2540330	1795620	1392030	1203230	1131560	1104890	1089120	1071310	1036230	986860	923960	857090	790450	728580	670400	619990	572320	530810	496090	464790	437510	410550	384620	7847460	4188900	2371130	1610570	1212590	955510	741040	583060	462450
scrambled NPY-8	1e-05	NPYR-1	1	414460	194550	66280	52330	48400	44710	39780	36390	35860	34030	30450	27590	26880	27680	27190	27040	26850	25880	24750	23510	23110	23690	26680	28040	27770	25300	24060	23910	22630	21060	20300	15361960	8234670	4766770	3365230	2590110	2055580	1583610	1207430	968450
scrambled NPY-8	1e-05	NPYR-1	1	386100	191610	103550	100270	82990	61270	44940	35730	31080	28540	27740	27060	26410	25390	24630	23620	23800	26510	29460	31040	30950	30730	29140	27400	26580	25870	24920	24350	24250	24610	23960	16986520	8718110	4816730	3255460	2346420	1707860	1252560	946640	729970
Cell medium	0	NPYR-1	1	67300	45780	11420	8360	11260	12610	12400	11840	10880	9620	8490	7370	6960	6590	6090	5520	5290	5240	5140	4910	4610	4330	4120	3930	3880	3930	3830	3460	3130	2770	2740	5418040	3649690	2806940	2710600	2442600	2006110	1620470	1208360	881420
ATP	1e-06	NPYR-1	1	37310	21400	11740	48970	184910	399380	546900	553320	454140	335260	234760	165090	126580	111380	113350	125300	142910	162890	179400	187740	189020	183990	172840	161650	151500	143030	136620	132050	128770	126100	123950	4064630	2555680	1755990	1402600	1088110	790540	674630	514390	454490
scrambled NPY-8	1e-05	NPYR-1	1	99620	62740	14900	8430	8160	8890	8980	7790	5950	4780	3850	3260	3320	3030	2940	2970	3120	3270	3520	4130	3970	4190	4290	3880	3460	3320	3470	3520	3510	3650	3540	4672910	2974260	2181620	1748750	1431200	1127770	847790	657290	509070
scrambled NPY-8	1e-05	NPYR-1	1	88680	62640	24820	20250	19330	16310	13200	11150	9580	8050	6720	5740	4830	5020	5220	5460	5310	4690	4550	4440	4280	4030	3970	4210	4040	4030	3770	3430	3150	3050	3110	4652850	2849130	2100350	1907280	1537410	1118660	784280	569820	400490
Cell medium	0	NPYR-1	2	399580	194520	46700	13060	6520	7980	9660	8370	6390	5060	4000	3530	3130	2810	2530	2360	2380	2150	2340	2270	2520	2630	2730	2650	2640	2480	2370	2130	1950	1800	1690	7082110	1607080	438800	176370	91640	57760	50670	39740	37460
ATP	1e-06	NPYR-1	2	387560	223100	63660	33480	45880	72690	114690	160270	193380	199550	183640	156120	124050	99300	83600	79950	86320	104420	133320	166250	202030	228230	241660	244590	236990	227140	214350	202580	191630	183480	178790	6745720	1415130	357490	212140	160650	156640	88590	72110	76280
NPY-8	1e-05	NPYR-1	2	214810	104390	97030	244260	376990	401450	351310	278410	216940	171260	140730	119140	107250	101270	98000	95250	92880	91620	89650	86320	84120	79250	73750	68190	63020	57540	52810	48870	44270	40380	38050	6750490	1413390	370860	199380	181310	114260	77100	88540	61610
NPY-8	1e-05	NPYR-1	2	93770	84680	111440	235300	298830	288920	246790	203820	165120	130540	105660	90160	78920	72980	69130	67750	65820	64320	61940	58450	55420	50610	45330	41830	38360	36820	34000	31740	29720	27740	25630	4604620	1106060	364610	195510	175620	146100	120150	74580	88550
Cell medium	0	NPYR-1	2	43510	23460	8710	10850	12900	9790	7280	5870	5100	4850	4580	4540	4090	3560	4040	4300	4500	3040	2470	2320	2310	2490	2490	2300	2220	2250	2180	2030	2030	2110	2050	4945040	1003980	264050	157160	122290	74340	44140	26690	21860
ATP	1e-06	NPYR-1	2	51160	41560	17130	28240	79470	190650	327100	396570	378810	318800	250330	192030	152710	136270	139500	158370	183830	206490	219040	226390	243700	226250	211490	195780	185140	179190	176690	175480	176580	175590	170220	4590640	992170	446000	292840	161920	92240	52690	36260	21840
scrambled NPY-8	1e-05	NPYR-1	2	135230	111720	33420	20910	18600	18190	16240	13660	10840	8850	7660	6530	5660	4960	4600	4090	4300	4280	4020	3620	3290	3160	2980	2770	2700	2830	2630	2590	2440	2320	2230	7689070	1759000	505660	267360	184580	150310	128670	105290	84550
scrambled NPY-8	1e-05	NPYR-1	2	153550	147770	36490	27350	27310	22450	16120	12110	9740	8230	7230	6800	6250	5920	5540	5330	5520	5830	6280	6490	6520	6440	6310	6420	6350	5900	5470	5220	5120	4750	4600	7280030	1472090	488990	274340	218140	115850	99710	60240	61720
Cell medium	0	NPYR-7	1	297860	164010	51080	33830	31540	28780	26010	23270	20500	19150	18550	17870	17430	16820	15700	15590	16210	17290	18650	19610	19190	19210	19220	19440	19310	19080	18270	17880	17400	17640	17490	14504140	8436390	4515560	2803450	2044280	1597040	1243430	970440	749220
ATP	1e-06	NPYR-7	1	182550	92630	115040	715690	2309550	3711230	3924210	3380050	2622950	2115480	1637200	1247540	1003120	862340	796890	777840	784880	806040	822910	828030	814910	788830	747430	698880	649640	599420	553140	507590	466860	431790	403850	6000370	3086440	1602370	1057320	688650	506650	399600	368560	292810
NPY-8	1e-05	NPYR-7	1	271720	166020	67560	69060	70320	61940	53260	44850	36070	30440	25800	22620	20350	19700	18660	18210	18350	19920	21860	23010	22910	22510	22540	21920	20770	19860	18950	18100	15910	14470	12820	15654290	8134450	4458040	3078970	2417930	1878550	1463810	1127000	921170
NPY-8	1e-05	NPYR-7	1	474440	234970	65270	39800	32890	27800	22620	19470	18650	18180	16970	15600	15420	16680	17380	17050	16810	15830	15120	14620	14460	13870	13670	13050	12930	13520	13990	14480	14290	14490	13290	16495200	7856210	4072160	2706530	2156490	1708400	1353440	1059720	833190
Cell medium	0	NPYR-7	1	545960	267110	86670	84260	78100	62950	50730	42920	36490	31840	27600	24090	21890	20570	19640	19260	19530	20100	20180	19630	19070	18300	18280	17060	15980	14920	15200	14970	15070	17050	20690	18898780	8712000	4611900	3393020	2657870	2103180	1680880	1341930	1027180
ATP	1e-06	NPYR-7	1	360430	207720	540640	3509360	7332290	7849090	6248720	4394000	2999000	2118070	1621280	1375020	1287450	1284520	1309980	1323140	1295690	1235950	1150480	1049750	950950	860820	787030	723170	667600	622080	584160	547140	512230	479260	447340	6952800	3174910	1658770	1083070	794620	627140	510100	402310	355210
scrambled NPY-8	1e-05	NPYR-7	1	572530	262950	121390	121380	108850	88360	68380	55910	46910	40550	36920	34610	31840	30950	29370	29140	28110	26470	25590	25650	27010	28620	29670	29680	28630	27030	25790	24790	23410	22620	21520	18740630	9488580	5407420	3845660	2949530	2230580	1705200	1321330	1045090
scrambled NPY-8	1e-05	NPYR-7	1	882220	389690	148490	141390	134280	115510	90530	71110	59400	51520	47600	44170	43030	42220	40640	39190	38620	39710	40390	40830	40850	40580	41820	41410	40730	39340	38370	37380	36540	35330	33680	20764250	10608600	5743740	3880660	2966250	2315240	1774200	1353320	1023350
Cell medium	0	NPYR-7	2	134730	60510	13170	6390	7730	9140	9890	10340	10450	8970	7220	5730	4640	4010	3860	3160	2690	2430	2340	2240	2090	2080	2070	2030	1690	1490	1140	1070	1030	940	880	5639560	1215430	263820	74240	31080	24680	10090	6920	7890
ATP	1e-06	NPYR-7	2	149850	110150	29560	9780	9440	14690	24050	35430	44480	49740	50380	48970	46120	42520	38570	35530	32900	31110	30480	33180	37270	42710	47510	51190	54050	55510	55550	55000	55110	55480	55690	5954920	1377570	505920	166530	55720	29690	18720	28660	31120
NPY-8	1e-05	NPYR-7	2	160260	88620	30890	19730	16940	15230	14160	13330	12550	11850	10810	9510	7950	6870	5950	5000	4280	3680	3160	2870	2580	2630	2530	2480	2470	2660	2700	2690	2770	2820	2700	5583540	1443260	463820	254590	158870	95560	65990	58190	45270
NPY-8	1e-05	NPYR-7	2	93040	39500	15110	14160	14740	13650	11620	9920	8400	7120	5930	5430	5040	4640	4480	4330	4290	4450	4600	4920	4890	5140	5360	5430	5520	5750	5760	5880	5730	5620	5530	4146460	802790	188080	84290	50120	33800	20630	12690	9600
Cell medium	0	NPYR-7	2	43370	28400	10640	9050	9310	9260	8300	6850	5660	4660	6470	6810	3740	2640	2520	2190	1990	1750	1750	1580	1420	1430	1360	1400	1300	1230	1210	1220	1250	1230	1190	4105470	759180	165910	82890	56020	39900	26360	20680	20980
ATP	1e-06	NPYR-7	2	205080	147630	50460	27360	38500	65220	101040	135120	151720	150400	137050	116870	94610	77840	69320	70070	72430	76410	80940	84010	86140	86370	85180	82890	78720	74210	70830	67640	64020	62590	63640	5137390	987090	312110	146050	71680	37250	34340	19330	24370
scrambled NPY-8	1e-05	NPYR-7	2	140840	64330	15940	7330	5470	5520	5470	5300	4730	4270	3710	3530	3190	2890	2650	2860	2800	2890	2880	3160	3460	3740	4540	5350	5870	5540	5440	6070	5980	6150	6920	6669530	1249770	343010	106120	62570	41020	43740	50180	34430
scrambled NPY-8	1e-05	NPYR-7	2	44110	52570	40050	37540	31380	24190	18600	14810	11500	9370	8070	6870	6100	5690	5530	5290	5130	5230	7930	6320	5790	5520	5550	5490	5430	5590	6340	7120	8140	8960	9460	4777820	1085890	309810	207260	176780	156170	125050	98250	116080
Cell medium	0	NPYR-8	1	464070	263120	94530	54190	49680	54030	52360	47150	41650	36020	31390	26680	23010	20160	17740	16780	16050	15590	14770	13900	12630	11690	11130	10620	9570	8990	8330	7720	7100	6820	6620	8633820	5225310	3247180	2355520	1935150	1717300	1511010	1285020	1098910
ATP	1e-06	NPYR-8	1	185180	94030	89540	414490	1164250	1982920	2374990	2286750	1954440	1566510	1225940	962570	775620	683320	610190	564560	547000	549620	562750	577680	589270	588610	579510	560440	536180	503870	469160	435370	402720	373190	348080	5774320	3610080	2135340	1474040	1221080	1057410	938950	868500	760920
NPY-8	1e-05	NPYR-8	1	122950	67700	33050	36770	45530	49540	49680	45830	39000	33820	30710	29840	30780	31880	32540	31830	29850	27200	25120	23630	22800	21500	20580	19280	18860	17550	16040	14940	14130	13490	12030	10923590	5259910	2633300	1649270	1187860	941630	763080	618570	488120
NPY-8	1e-05	NPYR-8	1	45440	36850	15540	12140	13830	16070	16790	16350	16940	18530	20500	20920	20700	19760	18900	17570	15620	12930	12270	12100	11490	11080	10920	10550	10360	9840	9250	8710	8180	7880	7590	10688270	5258400	2690670	1711610	1263960	985490	780920	650300	522090
Cell medium	0	NPYR-8	1	184670	122680	50030	39750	40860	37520	32430	28990	24950	21670	19910	18770	18170	17000	16010	14720	13890	13190	12800	12780	12570	12870	12720	12740	12610	12650	12610	12510	12470	12240	12160	15703550	8236070	4415610	3142440	2689090	2422540	2036340	1658030	1328680
ATP	1e-06	NPYR-8	1	176810	113150	510400	2671710	5582370	6372100	5366700	3974420	2810500	2004790	1502500	1218320	1064940	995560	975750	966040	952390	919120	872130	815330	754470	694080	637240	588910	545940	507930	474850	444950	417560	391610	368780	8551770	4364040	2240600	1439530	1078530	886610	762500	652500	563730
scrambled NPY-8	1e-05	NPYR-8	1	178140	138060	68440	61790	55280	44990	38210	33960	30300	26970	24140	23200	22750	21990	21280	20090	19130	18730	18010	16390	15270	14580	14360	14550	14830	14620	14450	13690	12710	12060	11740	14705560	7580220	4021030	2691180	2063530	1713630	1442660	1188680	966740
scrambled NPY-8	1e-05	NPYR-8	1	166280	103210	63030	70220	68220	62660	53590	43750	38440	35030	32560	30960	29100	27380	25480	23790	22480	22210	21790	21480	20720	20060	20100	19340	18220	17660	16430	15680	14610	13880	13230	15340380	7736130	3991100	2638910	2031320	1577670	1294650	1063540	827750
Cell medium	0	NPYR-8	1	17180	12880	3420	1770	2290	3040	3040	2820	2400	1890	1500	1160	960	1070	1070	1080	920	900	930	1150	1050	1140	1220	990	750	690	630	590	650	510	530	1851040	1028750	654020	520530	386670	305830	269220	184170	142890
ATP	1e-06	NPYR-8	1	42720	16230	4430	4630	19090	50130	85430	105630	107180	95230	77380	61760	49020	40190	35400	34660	36660	41320	47520	54450	60410	64690	66440	66950	66600	66050	62260	59860	57810	55080	52640	1186430	784980	545280	475450	368980	246630	179560	129100	99160
NPY-8	1e-05	NPYR-8	1	42410	22190	8680	3180	2050	2060	2350	2620	2180	1870	1830	1800	1740	1830	1920	2050	2200	3000	3730	3020	2570	2050	1840	1630	1470	1850	1710	2000	1540	1220	1120	1674080	985920	661990	561290	461210	361070	242740	149930	106320
NPY-8	1e-05	NPYR-8	1	14060	15680	3690	2130	2450	3200	4280	4460	3780	2910	2340	1890	1480	1260	1180	1040	1010	1040	940	900	880	910	970	910	980	790	720	640	610	680	620	1442390	897910	685730	538660	429250	269890	195900	135970	102750
Cell medium	0	NPYR-8	1	12340	4640	1870	1860	2470	3040	2890	2260	1820	1460	1100	1020	1040	940	900	930	1070	900	910	860	840	840	840	910	930	940	950	960	930	910	870	1593660	1095820	910060	758660	616700	449520	288720	214270	143550
ATP	1e-06	NPYR-8	1	24000	10970	7100	23280	91580	198840	264200	256200	204500	147600	101220	71380	55460	47960	48360	52660	58530	64070	69580	73410	74780	74240	71750	67480	63420	58860	55030	53120	51640	49720	48360	1349100	738640	531210	422060	281280	195040	157870	112130	97160
scrambled NPY-8	1e-05	NPYR-8	1	45410	35710	10070	7990	5630	4250	3410	2520	1930	1780	1570	1250	1110	1020	1000	870	910	980	1010	960	900	890	890	840	860	890	980	990	940	830	820	1972920	1250140	833090	610820	518730	310310	179640	127470	95210
scrambled NPY-8	1e-05	NPYR-8	1	42060	14310	6500	5360	4220	3090	2210	1600	1220	1100	1030	990	1000	950	1040	1170	1260	1460	1310	1230	1150	1170	1200	1200	1170	950	950	1040	1180	1310	1630	1782560	999480	836740	886190	726820	537020	364150	265510	178620
Cell medium	0	NPYR-8	2	1218080	521150	110890	40740	36070	39840	38110	31600	24890	18360	13820	9970	8060	6850	6000	5590	5210	5240	4540	4300	4080	3900	3910	4020	4030	3930	3440	2760	2310	2020	1770	5301330	1136930	257110	76080	26270	14390	17050	28760	21460
ATP	1e-06	NPYR-8	2	122710	77770	25880	35600	95690	247060	462800	639000	704600	667800	576510	468970	375390	307020	262320	236910	230330	242940	268480	297640	324900	346140	358800	361490	353770	337630	317700	296870	278330	262370	247780	5505930	1396290	651420	300570	144940	57260	35780	38360	31390
NPY-8	1e-05	NPYR-8	2	409990	152750	40270	20330	16950	15260	13670	11990	10210	8550	7470	6330	5320	4570	4010	3480	3340	2980	2830	2600	2300	2180	2020	1950	1820	1790	1850	1700	1650	1620	1570	12149030	2791370	697420	233300	87860	62220	48210	46230	30370
NPY-8	1e-05	NPYR-8	2	483600	257280	69830	67180	66460	51070	34830	23520	15870	11550	8810	7040	5730	4440	3240	2550	1930	1690	1560	1480	1490	1360	1340	1270	1250	1200	1020	1200	1070	980	990	8550050	1967280	618430	194080	66860	37270	24670	16450	11160
Cell medium	0	NPYR-8	2	585080	432690	191280	87350	50830	38090	33340	27020	19510	12700	8270	5560	3700	2800	2230	2030	1950	1910	1760	1670	1570	1430	1360	1300	1320	1310	1310	1260	1340	1400	1310	9181590	1893150	435230	139820	99010	72510	42490	41950	50970
ATP	1e-06	NPYR-8	2	629340	348280	117810	385370	1350450	2535620	2884360	2442420	1757860	1183700	808180	605420	532110	546560	616520	704170	781250	817380	800000	741890	670210	596970	535140	488490	457630	437300	426450	418520	408880	395650	376900	7709490	1464610	300260	99700	86230	65820	38420	15190	9690
scrambled NPY-8	1e-05	NPYR-8	2	566980	299220	80220	72010	64310	52420	40960	29530	20690	15810	12550	9140	6760	5170	4220	3710	3380	3000	2600	2370	2370	2500	2400	2420	2280	2130	1900	1820	1770	1810	1760	13130330	2936160	658640	249000	195200	93090	67030	74310	55080
scrambled NPY-8	1e-05	NPYR-8	2	856550	460160	129490	132020	117190	84860	59600	43750	33950	27320	22060	17850	14140	11080	8740	7510	6080	4870	4170	3720	3820	3990	3770	3400	2850	2460	2150	1860	1700	1740	1770	12170630	2547340	633180	254470	128660	138840	94990	56960	51010

## Sheet: Fig 3C
				RLUs in Time (s) - peptide administration at 0 sec; 0.1% Triton X-100 administration at 30 sec
Sample	[compound] (M)	Receptor	Day	00:00:00	00:01:00	00:02:00	00:03:00	00:04:00	00:05:00	00:06:00	00:07:00	00:08:00	00:09:00	00:10:00	00:11:00	00:12:00	00:13:00	00:14:00	00:15:00	00:16:00	00:17:00	00:18:00	00:19:00	00:20:00	00:21:00	00:22:00	00:23:00	00:24:00	00:25:00	00:26:00	00:27:00	00:28:00	00:29:00	00:30:00	00:40:10	00:41:10	00:42:10	00:43:10	00:44:10	00:45:10	00:46:10	00:47:10	00:48:10
Cell medium	0	NPYR-1	1	3410	2160	940	870	820	810	730	680	590	490	440	380	370	380	340	380	350	320	300	280	260	260	230	220	200	220	190	200	170	200	150	327260	87030	25240	8590	4090	2630	2070	1830	1470
NPY-8	1e-05	NPYR-1	1	3160	1690	1130	2610	5470	7450	7730	6980	5720	4860	3970	3610	3100	2990	3000	3060	3060	3000	3110	3220	3050	2930	3100	2850	2780	2500	2460	2300	2100	1920	1930	263110	70600	20590	7530	4430	3080	2270	2470	2010
NPY-8	1e-06	NPYR-1	1	2250	2480	2450	5550	8650	9750	9230	8110	6720	5460	4270	3830	3580	3530	3630	3400	3440	3540	3620	3260	3220	2990	2960	2860	2720	2480	2370	2340	2180	2160	2050	283190	77380	24180	9120	4720	2980	2250	2250	2050
NPY-8	7.5e-07	NPYR-1	1	1770	1660	1930	5180	8910	10090	9640	8610	7200	6130	5020	4550	4220	4060	3970	3960	3840	3800	3580	3530	3290	3100	2940	2760	2700	2590	2580	2300	2270	2200	1980	266700	69180	19910	7970	4490	3000	2310	1600	1350
NPY-8	5e-07	NPYR-1	1	1370	1220	1540	4260	7320	8010	7160	5610	4330	3600	3070	2860	2820	2780	2780	2860	2870	2740	2530	2450	2330	2210	2050	1860	1840	1820	1720	1630	1520	1530	1370	225630	61920	18370	7750	4980	4420	3910	3520	3480
NPY-8	2.5e-07	NPYR-1	1	970	900	1170	3190	5580	6310	5760	4780	4060	3450	3070	2660	2300	2280	2390	2300	2390	2380	2200	2120	2070	1890	1790	1690	1570	1480	1300	1330	1260	1170	1130	193550	49030	14590	4650	1960	1400	1230	1150	1060
NPY-8	1e-07	NPYR-1	1	1930	1240	950	2430	4760	5640	5870	5140	4240	3550	3250	3010	2890	3060	3000	2770	2740	2730	2520	2500	2350	2160	2040	1860	1760	1650	1510	1490	1400	1290	1140	218030	56550	17790	7560	4150	3730	4370	3900	2540
NPY-8	7.5e-08	NPYR-1	1	2480	2130	1390	2800	5150	6260	6060	5600	4920	4180	3790	3450	3240	3310	3110	3110	3080	3150	3010	2940	2730	2480	2380	2370	2320	2190	2120	1940	1780	1660	1550	279940	71700	21690	8420	4430	3550	2630	2200	1820
NPY-8	5e-08	NPYR-1	1	4240	4250	2450	4320	7990	10010	10090	9020	7730	6090	4890	4180	4140	3970	4270	4440	4440	4230	3960	3730	3680	3470	3150	3060	2770	2730	2500	2340	2210	2040	1890	441610	112350	31370	10400	4050	3140	2680	2340	1970
NPY-8	2.5e-08	NPYR-1	1	2550	1840	870	1150	2330	3440	3990	3770	3410	2820	2700	2770	2880	2980	3100	3190	3000	2820	2730	2590	2430	2400	2270	2270	2250	2170	2030	1910	1760	1620	1570	345650	87160	24550	8570	4720	2880	2610	2870	2750
NPY-8	2e-08	NPYR-1	1	2840	1920	1290	1260	1870	2780	3530	3520	3190	2940	2690	2470	2450	2580	2750	2770	2660	2620	2590	2470	2410	2240	2260	2120	2160	1940	1960	1930	1760	1590	1730	464280	122270	36190	14770	8440	6050	4630	4580	5000
NPY-8	1e-08	NPYR-1	1	2110	1840	1040	940	1100	1300	1370	1480	1550	1510	1470	1420	1250	1300	1330	1230	1290	1370	1290	1350	1320	1210	1170	1300	1230	1130	1030	990	960	920	970	265490	63900	17160	5160	2000	1270	1000	940	910
Cell medium	0	NPYR-1	1	4700	3500	2030	1630	1420	1310	1040	930	840	940	920	970	980	860	710	630	650	610	650	650	560	540	520	540	520	530	530	430	460	440	500	417870	104670	29820	9980	5130	3820	2870	2190	1840
NPY-8	7.5e-09	NPYR-1	1	2410	2000	1330	1380	1270	1310	1410	1640	1780	1830	1930	1790	1760	1770	1750	1810	1780	1820	1900	1940	1840	1750	1650	1680	1720	1590	1500	1360	1350	1260	1120	417490	106520	30020	9820	5000	4120	3150	3010	2130
NPY-8	5e-09	NPYR-1	1	1610	1240	850	850	810	780	820	950	950	1200	1370	1360	1530	1500	1520	1610	1560	1510	1470	1470	1490	1360	1320	1330	1340	1260	1200	1210	1230	1140	1030	290340	74440	21370	7880	3850	3030	3110	3030	3030
NPY-8	2.5e-09	NPYR-1	1	1770	1680	1230	1170	1000	920	830	850	880	890	940	940	920	940	980	940	930	980	980	980	950	900	890	840	870	930	870	850	850	910	910	347820	87200	24180	9370	5440	3650	3190	3070	3080
NPY-8	2e-09	NPYR-1	1	1770	1340	1410	1240	1030	990	870	910	1000	1020	980	980	1000	1000	910	890	880	880	870	840	780	760	810	800	840	840	760	710	600	550	600	310620	76010	20690	7460	4330	2830	3360	4370	4470
NPY-8	1e-09	NPYR-1	1	2680	2080	1330	1300	1390	1480	1230	1090	1010	960	920	910	840	860	830	890	920	850	760	730	770	720	830	780	850	850	810	800	720	740	800	435480	102210	26960	7930	3120	2030	1970	1780	1620
NPY-8	7.5e-10	NPYR-1	1	2330	2200	1370	1110	1040	960	770	580	580	540	540	530	530	570	580	510	490	570	600	560	530	570	570	580	540	600	560	600	680	670	710	309170	74190	18830	6390	3310	2030	1780	1640	1480
NPY-8	5e-10	NPYR-1	1	1530	1540	1200	1230	1180	990	780	620	560	460	460	450	430	410	430	400	420	440	400	390	370	310	380	390	400	350	400	400	380	410	390	332580	78670	21220	7170	5860	4030	4930	4410	3620
NPY-8	2.5e-10	NPYR-1	1	1560	1550	1180	1400	1060	770	630	490	500	470	500	500	530	470	510	510	430	430	490	490	520	450	450	480	490	500	510	470	430	400	400	295590	69400	18080	6310	5020	3500	2640	2830	3300
NPY-8	1e-10	NPYR-1	1	2680	2730	1580	1380	1390	1270	1120	920	810	730	710	740	710	680	660	600	630	490	520	560	610	650	700	610	600	700	660	640	650	660	580	394920	93570	25520	8900	4630	3670	3330	2750	2490
NPY-8	5e-11	NPYR-1	1	5020	2720	1710	1370	1350	1120	870	800	690	700	660	600	650	720	750	710	730	700	680	680	670	600	720	700	700	690	720	610	620	600	540	343690	80860	21580	8180	5390	3990	3600	3920	3410
NPY-8	1e-11	NPYR-1	1	1550	1860	1530	1460	1400	1240	1160	1100	960	880	900	920	900	710	700	690	700	710	680	610	560	570	580	560	530	560	530	500	510	530	550	323280	72960	19260	6630	3030	2050	1620	1520	1500
Cell medium	0	NPYR-1	1	4440	3240	1770	1580	1440	1240	1170	1100	1010	1040	980	970	900	820	770	750	750	710	640	640	640	680	690	1260	620	630	610	530	510	490	410	536470	131580	37040	13160	7670	5010	3550	3480	3520
NPY-8	1e-05	NPYR-1	1	7940	5610	7200	18580	27220	29320	26350	22740	19400	17650	16220	15550	14990	14280	13780	12900	11980	11510	10890	9950	9020	8270	7810	7370	6660	6110	5810	5540	4920	4560	4300	502050	122030	33960	12540	7130	5080	3040	2140	1580
NPY-8	1e-06	NPYR-1	1	4960	4670	4290	12430	19900	21320	19700	17340	14360	11910	10350	9890	9780	9620	9480	9120	9210	8720	8880	8130	7430	7010	6690	6450	5950	5580	5000	4450	4060	3710	3550	471870	110440	31150	11050	5570	4030	3710	3540	3490
NPY-8	7.5e-07	NPYR-1	1	3610	2020	2670	7210	11070	11520	10010	8210	6720	5760	5500	5220	5080	5060	5050	4960	4540	4270	3920	3780	3540	3250	3070	2800	2650	2570	2350	2150	2010	1820	1670	243410	57000	15050	5680	3680	2670	2670	2530	2550
NPY-8	5e-07	NPYR-1	1	4380	2920	3830	8240	11850	12310	10900	9200	8280	7390	7220	6900	6420	5980	5270	4910	4760	4400	4320	4050	3880	3500	3370	3160	2940	2810	2620	2550	2430	2180	1910	303440	71290	19510	7750	4380	3220	3140	2870	2440
NPY-8	2.5e-07	NPYR-1	1	2560	2340	2930	7740	11740	13020	12310	10870	9030	7590	6380	6010	5630	5360	5040	4890	4590	4170	3880	3600	3570	3280	3250	2980	2730	2380	2240	2320	2220	1950	1860	301070	67820	18580	7310	4320	4840	4490	3410	2880
NPY-8	1e-07	NPYR-1	1	3010	2410	2280	5760	9950	11580	11240	10070	8660	7370	6530	6130	5770	5440	5380	5460	5210	4970	4590	4170	3860	3560	3350	3090	2820	2650	2470	2320	2170	2040	2000	346770	80090	22780	9400	5180	3680	3280	3840	3750
NPY-8	7.5e-08	NPYR-1	1	1670	1450	1480	4300	8290	9340	8870	7510	6240	5230	4940	4720	4630	4630	4380	4110	3950	3720	3740	3340	3240	3000	2730	2490	2410	2320	2200	1970	1880	1820	1650	313440	69500	18540	6490	3820	3460	3370	2570	2320
NPY-8	5e-08	NPYR-1	1	1810	1680	1520	3830	7760	9610	9450	8070	6600	5420	4900	4730	4920	5030	5050	5130	4690	4320	3800	3540	3260	2960	2880	2640	2670	2530	2400	2150	1950	1870	1710	453930	104530	28130	9600	5130	3970	3500	3110	2980
NPY-8	2.5e-08	NPYR-1	1	1820	1130	840	1140	1990	3190	3510	3310	3240	3010	2710	2440	2390	2400	2540	2660	2570	2410	2390	2220	2120	1880	1800	1770	1610	1480	1430	1390	1310	1220	1140	264440	64820	16500	5840	3890	2220	2040	1720	1400
NPY-8	2e-08	NPYR-1	1	3170	2740	1280	1120	1680	2650	3180	3140	2770	2610	2380	2310	2340	2420	2510	2580	2400	2330	2200	2130	2130	2040	2050	1910	2090	1850	1740	1640	1610	1530	1510	371100	81210	22070	8700	5410	3820	3800	3240	2750
NPY-8	1e-08	NPYR-1	1	6390	4450	1550	1120	1800	2420	2670	2760	2760	2690	2440	2370	2290	2060	2150	1980	2110	1960	1700	1600	1340	1370	1260	1330	1260	1210	1010	1030	910	880	870	505370	113860	31420	13000	7600	5200	4910	3400	2960
Cell medium	0	NPYR-1	1	4370	2990	1360	1200	1090	990	1170	1450	1460	1480	1390	1480	1430	1360	1220	1220	1120	1050	1000	920	900	820	800	810	770	820	800	730	770	790	660	390250	89540	24610	9360	4660	3310	2680	1970	1370
NPY-8	7.5e-09	NPYR-1	1	5980	4270	1880	1790	1630	1540	1670	1840	1710	1720	1720	1650	1560	1520	1540	1590	1680	1680	1630	1550	1600	1580	1460	1420	1290	1230	1200	1210	1190	1110	1060	480160	111790	30940	10610	5530	4720	3900	3950	2890
NPY-8	5e-09	NPYR-1	1	5070	3560	2190	2510	2070	1620	1390	1170	1310	1220	1250	1100	1250	1270	1230	1150	1160	1120	1030	1080	1030	970	860	800	810	780	800	770	780	760	810	371760	83590	21670	8540	4940	3670	3040	2110	1950
NPY-8	2.5e-09	NPYR-1	1	3340	2930	1670	1420	1240	1240	1180	1150	1250	1400	1600	1590	1680	1550	1480	1600	1560	1570	1550	1560	1510	1720	1770	1750	1620	1480	1580	1640	1600	1640	1710	279890	64900	20030	10480	8500	8420	6600	5390	5140
NPY-8	2e-09	NPYR-1	1	5090	3160	1780	1490	1230	1010	960	970	900	920	850	1000	1040	1000	920	970	1110	1330	1560	1640	1730	1780	1860	1960	1840	1960	1930	1920	2040	1990	1820	385010	86680	24100	10100	5580	3490	2070	1480	1400
NPY-8	1e-09	NPYR-1	1	2840	2480	1540	1320	1140	950	960	960	930	950	870	830	820	940	970	960	890	1080	1180	1270	1350	1400	1510	1620	1640	1730	1770	1730	1490	1470	1590	313690	68810	17700	6530	4090	3720	3520	3020	3140
NPY-8	7.5e-10	NPYR-1	1	2820	2140	1270	910	890	790	820	740	680	720	750	820	740	720	700	750	700	600	620	580	560	490	500	520	470	480	470	480	470	470	510	250810	53900	14480	4970	2790	1740	1830	1910	1660
NPY-8	5e-10	NPYR-1	1	4170	2860	1540	1250	1070	860	810	720	710	800	800	700	660	660	590	580	560	530	530	500	510	540	580	540	480	530	540	490	550	650	630	343340	74210	18820	7470	3970	3160	2850	2420	2580
NPY-8	2.5e-10	NPYR-1	1	5730	3990	1750	1700	1750	1720	1370	1090	910	860	840	840	880	900	830	840	740	710	690	600	610	570	600	590	730	740	690	660	600	570	480	473060	99080	24560	8110	4060	3150	3100	2410	1990
NPY-8	1e-10	NPYR-1	1	2640	1710	860	910	800	760	670	730	670	650	650	640	580	550	570	570	580	570	580	570	580	600	580	550	550	570	570	600	540	500	550	270300	57100	15090	5900	3290	2590	2090	1680	1590
NPY-8	5e-11	NPYR-1	1	2270	1810	920	670	640	600	570	490	490	460	550	620	610	500	550	510	470	460	450	430	350	400	370	350	360	430	450	460	520	540	620	257380	52150	12950	4570	2460	1930	1740	2020	1660
NPY-8	1e-11	NPYR-1	1	5880	3640	2800	1940	1350	1110	1100	940	860	890	850	750	730	620	570	560	580	530	430	420	450	480	510	500	510	470	550	510	500	500	590	385210	81220	23430	10370	6410	3940	3480	2740	2160
Cell medium	0	NPYR-1	1	1730	1180	850	940	940	1060	1030	1240	1500	1750	1900	1890	2030	1900	1790	1540	990	600	570	520	710	1100	1210	1020	800	740	700	650	680	680	770	277500	60890	16760	6840	4320	2980	2490	2540	2490
NPY-8	1e-05	NPYR-1	1	2220	1660	4430	12830	17460	16350	13550	10290	8060	7100	6550	6430	6520	6390	6220	5800	5280	4650	4350	4090	3700	3490	3230	3000	2750	2430	2340	2290	2240	1940	1810	305100	65760	16460	5540	3420	2500	1990	2090	2190
NPY-8	1e-06	NPYR-1	1	13080	7860	6850	16620	22800	21970	18570	14800	12300	11210	11010	10800	10570	9950	9300	8650	8010	7250	6700	6120	5650	5360	4840	4790	5540	4880	3990	3440	2990	2820	2800	438440	95450	24350	10740	6260	3950	3130	3650	3550
NPY-8	7.5e-07	NPYR-1	1	3770	3070	5560	13130	16960	16150	13990	10770	8800	7580	7210	7190	6900	6520	6050	5950	5320	5100	4730	4350	3960	3580	3350	2980	2820	2810	2590	2420	2220	2220	2150	293990	67400	20440	8500	4810	4780	4050	3700	3760
NPY-8	5e-07	NPYR-1	1	9020	5440	5280	11050	14140	13860	13020	10570	8340	7560	7060	7100	6990	6390	5940	5440	4950	4660	4300	3960	3470	3300	3060	2760	2650	2410	2150	2100	1990	1730	1620	364810	79080	19480	8190	3820	2700	1910	1480	1180
NPY-8	2.5e-07	NPYR-1	1	3370	2350	2850	7370	12370	13550	11970	10220	8890	7750	7320	6920	7030	6710	6180	6050	5910	5610	5350	4870	4390	3990	3400	3060	2970	2920	2800	2840	2840	2600	2250	331810	73500	18020	6580	3690	3060	1960	1630	1300
NPY-8	1e-07	NPYR-1	1	12550	6950	4360	11120	16820	16630	13690	10700	8640	7820	7500	7430	7790	8020	7690	6940	6260	5490	4860	4580	4020	3700	3510	3320	3010	2890	2600	2350	2230	2060	1850	449160	94550	24170	8490	5030	4170	4620	4140	4630
NPY-8	7.5e-08	NPYR-1	1	4230	2970	2530	6210	9200	10000	8960	7510	6370	5540	5520	5600	5640	5730	5440	4800	4320	3770	3370	3050	2840	2660	2610	2380	2330	2180	2000	1870	1740	1580	1450	269530	58380	15380	5400	3340	2570	2490	2050	1690
NPY-8	5e-08	NPYR-1	1	8780	3020	2070	4390	8300	9870	9360	7640	6090	5310	5460	5620	5730	5980	5580	5420	4790	4610	4170	3880	3800	3810	3650	3740	3810	3790	3800	3800	3790	3760	3790	298740	63020	16840	6450	4810	4060	4070	4420	3200
NPY-8	2.5e-08	NPYR-1	1	25050	4140	2280	2730	4790	5810	6150	5890	5470	5280	5060	4530	4370	4220	4120	3910	3670	3560	3390	3170	2790	2770	2560	2480	2250	2040	1890	1770	1630	1490	1390	396300	82740	20770	6530	3490	2870	2380	2350	2260
NPY-8	2e-08	NPYR-1	1	6370	3890	1490	1670	2870	4030	4610	5120	4870	4480	4180	4020	3710	3630	3430	3410	3350	3300	3010	2740	2530	2370	2130	1860	1850	1900	1800	1810	1700	1710	1710	328880	69100	18900	8840	6870	5920	3670	3000	2290
NPY-8	1e-08	NPYR-1	1	8590	5780	2400	1760	1730	2130	2260	2120	2060	2040	2020	1990	2040	1880	1850	1760	1680	1670	1610	1520	1530	1440	1500	1350	1240	1130	1000	1090	890	850	830	400850	84400	22360	8720	5750	4820	3420	2790	2270
Cell medium	0	NPYR-1	1	3830	2760	1120	1020	960	890	890	820	800	800	740	700	640	580	660	610	560	570	550	500	550	520	480	450	400	440	430	490	430	420	430	408070	84680	19710	6030	3140	2360	1910	1980	2470
NPY-8	7.5e-09	NPYR-1	1	5030	3630	1380	1210	1480	1680	1890	2160	2250	2230	1990	1940	1960	1770	1850	1800	1880	1850	1810	1730	1610	1370	1350	1350	1310	1350	1400	1500	1390	1300	1240	334870	75290	20610	7900	3990	2760	2310	2330	2440
NPY-8	5e-09	NPYR-1	1	3990	2850	1990	1520	1240	1270	1290	1310	1190	1220	1220	1270	1340	1280	1280	1240	1100	980	900	870	870	980	950	940	860	910	850	970	1010	1000	970	342370	73330	19480	7690	4940	3270	2780	2590	2200
NPY-8	2.5e-09	NPYR-1	1	7080	4380	2320	1910	1540	1220	1180	1130	1010	1000	920	850	960	1090	1040	1070	1020	1080	1040	1060	1130	1170	1000	960	890	840	840	840	800	780	770	497620	104240	25770	8550	5480	4300	3650	3010	2400
NPY-8	2e-09	NPYR-1	1	5030	3120	1470	1580	1720	1510	1310	1170	1110	1060	1070	1080	1150	980	860	880	810	850	790	750	630	630	730	750	810	820	780	900	990	870	820	263900	52890	13400	6350	4740	3680	2870	2730	2880
NPY-8	1e-09	NPYR-1	1	6800	3570	1510	1060	940	760	770	850	830	980	1050	950	910	930	940	850	770	690	660	630	630	630	650	640	640	640	620	610	590	620	530	318480	63040	14810	4940	2360	1560	1130	1030	1020
NPY-8	7.5e-10	NPYR-1	1	12320	7340	3190	2620	2040	1670	1410	1180	1080	960	900	920	940	910	770	760	740	740	740	690	630	620	620	600	550	530	570	560	530	550	570	459620	91540	21280	7440	3900	2930	2770	3150	2060
NPY-8	5e-10	NPYR-1	1	6520	3730	1620	1200	1010	910	900	970	880	1010	1060	980	950	840	850	840	820	770	780	730	750	880	870	850	750	740	840	860	830	850	900	251930	49280	11840	4240	2910	2220	2870	2520	1540
NPY-8	2.5e-10	NPYR-1	1	5060	3580	1900	1550	1420	1330	1150	1070	970	820	870	930	940	890	870	870	760	760	770	890	780	780	760	790	710	680	700	650	650	650	680	337540	68980	17420	6150	4640	3070	3020	2500	2330
NPY-8	1e-10	NPYR-1	1	6920	3540	1680	1360	1190	1120	1000	1000	870	930	910	910	970	1070	990	830	810	720	680	680	690	680	800	930	810	750	680	720	750	740	720	338280	68260	17590	6780	4410	2920	3030	2030	1600
NPY-8	5e-11	NPYR-1	1	4110	2590	1600	1320	1010	940	1050	1100	1170	1290	1130	1040	910	860	790	700	660	650	670	660	750	720	730	770	650	670	680	630	700	750	720	321840	66900	18480	8200	4240	3280	3140	3700	3790
NPY-8	1e-11	NPYR-1	1	6860	3860	1490	1160	1080	980	720	710	800	890	830	830	880	940	1040	950	860	820	800	810	880	750	750	760	770	740	890	960	900	920	830	366400	75380	18540	6440	4330	2880	2790	2330	1660
Cell medium	0	NPYR-1	2	15190	8930	2380	860	520	470	420	440	410	440	360	310	310	310	280	220	230	240	250	220	170	170	190	230	200	200	200	220	200	220	180	412280	90670	22620	7990	4370	3460	3010	3520	2720
NPY-8	1e-05	NPYR-1	2	9450	4710	8380	20790	27630	27420	23760	19760	16880	15340	15450	15960	16450	16920	16930	17350	16360	15670	15140	14420	13200	12280	10970	9730	9070	8230	7480	7030	6520	6090	5460	473710	104540	27420	9110	5530	3170	2610	2200	2480
NPY-8	1e-06	NPYR-1	2	12710	6500	14620	33810	40710	37160	30270	24950	21400	20050	20040	20520	21390	21930	21600	20500	19420	17950	16230	15010	13220	12050	10840	10140	9290	8540	7920	7090	6640	6230	5660	518990	108520	25700	8670	6110	3390	3460	2050	1430
NPY-8	7.5e-07	NPYR-1	2	8150	4920	13220	31210	37380	33960	28200	24080	21340	20290	20060	20220	20070	20070	19390	18590	17200	15500	13920	12610	11380	10190	9040	8480	7950	7180	6580	5940	5470	4840	4410	434250	87050	19540	5580	2880	2500	1570	1300	1230
NPY-8	5e-07	NPYR-1	2	17300	7560	11130	25500	29880	27130	22470	18690	16870	16080	16330	16760	16210	15460	14540	13630	12500	11140	9970	8920	7970	7130	6580	5910	5470	4870	4340	4120	3830	3420	3300	354800	69510	15530	5390	3190	2160	1710	1340	1270
NPY-8	2.5e-07	NPYR-1	2	7650	4680	13770	31060	36810	32530	26560	22130	19790	18350	18380	18000	17550	16670	15610	14310	13150	12140	10460	9430	8430	7740	6830	6280	5580	5070	4530	4140	3690	3370	3230	364890	69400	15770	5140	3560	2390	2080	2080	1750
NPY-8	1e-07	NPYR-1	2	12980	5930	8530	20980	27520	26190	22110	18500	16790	16260	16370	16500	16670	16410	15600	14680	13460	11990	10760	9810	8860	7860	7120	6410	5920	5410	5000	4360	4020	3590	3450	383590	73460	17620	5620	2960	2150	2490	2380	1970
NPY-8	7.5e-08	NPYR-1	2	16510	8260	7290	19900	27900	26850	23050	19320	17410	17430	18110	18960	19100	18420	17570	16130	14730	13120	12050	10930	9780	8810	7860	7220	6550	5930	5420	4850	4400	3970	3600	462700	85600	19380	5960	3550	3650	2540	2030	1570
NPY-8	5e-08	NPYR-1	2	16830	7260	2370	4740	9590	11950	11430	10010	9150	9280	10620	12410	13520	14510	14480	13950	13070	12000	11090	10210	9300	8680	8160	7690	7050	6660	5950	5320	4930	4370	4080	586650	106310	23450	8320	6140	5640	3400	4080	3050
NPY-8	2.5e-08	NPYR-1	2	13200	6370	3570	10240	18850	20650	18040	15450	14260	15270	17310	19560	20430	20830	19870	18620	17130	15880	14360	12780	11530	10250	9390	8500	7820	7000	6280	5910	5450	5060	4410	609220	110640	23810	6610	4230	3470	2740	1820	1800
NPY-8	2e-08	NPYR-1	2	16480	8170	2590	3090	6220	8670	9300	8260	7360	7540	8810	9930	11060	11610	11140	10320	9630	8960	8360	7670	7410	6600	6140	5680	5090	4600	4110	3730	3320	2940	2670	559210	99370	21880	7060	4350	4120	3950	3890	2590
NPY-8	1e-08	NPYR-1	2	16610	7020	2440	2300	2650	3730	4240	4140	4030	3950	4490	4990	5560	6080	6180	6210	5650	5230	4860	4650	4200	3970	3810	3490	3330	2850	2490	2260	1980	1800	1690	508490	87470	17800	5530	2640	2730	3030	3340	3180
Cell medium	0	NPYR-1	2	21340	8660	2250	1150	820	600	510	390	340	330	320	290	280	260	250	260	260	210	250	240	220	250	250	210	220	230	220	230	190	210	250	505690	83640	16610	4970	2770	2050	1860	1890	1380
NPY-8	7.5e-09	NPYR-1	2	15710	8820	2910	2190	3470	4660	5030	4850	4690	4590	5080	5720	6550	6880	6620	6360	5880	5230	4740	4420	3810	3590	3250	3020	2890	2560	2370	2150	1930	1810	1580	526550	96340	22470	7640	3660	3310	3990	2730	2090
NPY-8	5e-09	NPYR-1	2	18390	10550	3390	2280	1970	1600	1410	1270	1260	1300	1170	1040	960	950	1000	1150	1310	1410	1180	1210	1120	1100	1160	1260	1360	1410	1520	1520	1470	1350	1180	526280	94180	23900	16690	14030	11200	8410	7540	4410
NPY-8	2.5e-09	NPYR-1	2	18930	7070	1760	1300	1340	1170	1160	1150	1110	950	980	970	1050	1170	1310	1400	1230	1140	1120	1110	1030	1010	1020	930	840	830	760	750	690	770	620	464710	77770	16900	6850	3970	3370	3600	3380	3070
NPY-8	2e-09	NPYR-1	2	20220	8250	2120	1150	930	860	840	730	610	580	540	510	510	520	470	520	480	430	460	440	420	460	430	420	460	360	360	350	390	340	400	506260	86170	18040	6850	3750	2630	2290	1820	1490
NPY-8	1e-09	NPYR-1	2	24040	9990	2390	1270	1010	800	740	590	530	490	380	370	330	350	300	300	310	330	280	300	300	290	300	280	310	320	290	280	360	260	260	556440	94730	19410	7030	4290	3220	2530	2010	1450
NPY-8	7.5e-10	NPYR-1	2	19810	8320	2100	1240	940	690	510	430	430	340	370	390	350	310	310	290	270	300	310	310	330	290	260	240	280	260	300	240	270	250	260	578550	101000	22670	7920	4730	4080	5350	5420	4410
NPY-8	5e-10	NPYR-1	2	28720	12940	3000	1770	1360	1090	830	740	640	600	470	480	490	510	520	460	550	520	510	520	510	470	450	400	400	380	370	340	310	340	290	499640	88210	21430	8180	6550	6670	5640	3990	3160
NPY-8	2.5e-10	NPYR-1	2	21880	7780	1870	980	770	750	740	640	490	490	400	380	350	320	290	320	340	340	300	300	290	300	320	340	310	290	300	320	320	320	310	582730	99970	20040	6450	3650	2960	2690	2190	1590
NPY-8	1e-10	NPYR-1	2	17300	7980	1760	890	720	640	530	500	420	420	420	350	320	310	350	280	300	310	300	320	290	300	270	290	280	300	300	260	340	260	280	567150	96410	22400	11190	8880	6550	4090	2790	2240
NPY-8	5e-11	NPYR-1	2	25230	10100	2190	1390	1220	990	820	640	570	440	440	360	380	300	330	310	290	260	300	310	290	250	270	280	280	290	300	290	310	270	290	570150	97190	20440	8630	6330	4860	4440	3330	2790
NPY-8	1e-11	NPYR-1	2	24600	11030	2700	1480	1210	1100	980	680	630	580	480	500	520	460	490	480	570	700	760	950	1050	1170	1290	1300	1300	1350	1350	1100	1050	1010	860	397940	67270	18370	9290	5220	4600	4350	2820	1960
Cell medium	0	NPYR-1	2	20150	7430	2090	1140	830	690	640	550	540	480	430	380	400	400	360	350	370	330	350	310	310	350	320	380	340	380	340	350	350	340	340	543830	84750	15910	5090	2870	2750	2300	4310	2830
NPY-8	1e-05	NPYR-1	2	25260	14920	27340	49310	52200	45750	40120	35740	33390	31060	29060	26880	24950	22800	20240	17920	16150	14290	12880	11370	10020	8870	7980	7200	6410	5540	4810	4390	3890	3350	3050	465530	78670	17930	8530	5500	2410	1900	1270	1240
NPY-8	1e-06	NPYR-1	2	16150	8070	14930	33960	38970	35280	30360	27410	25080	24020	23110	22160	20430	18460	16440	14400	12820	11400	10370	9200	8360	7500	6850	6210	5690	5110	4500	4140	3720	3490	3100	369770	63680	17590	9610	6350	5520	5780	4170	2640
NPY-8	7.5e-07	NPYR-1	2	20670	10220	21730	44140	47020	41340	35710	32910	30710	29690	28180	26440	24660	22720	20410	18430	15920	14060	12420	10940	9630	8690	7670	6910	6110	5340	4840	4370	3990	3350	2970	456720	73900	17140	8480	5650	3650	3360	2640	3590
NPY-8	5e-07	NPYR-1	2	27350	12210	16150	35320	40960	37420	33260	30770	29580	28310	27060	25080	23190	20840	18430	16270	14390	12320	10650	9170	8150	7160	6570	5950	5280	4750	4180	3690	3170	2890	2670	476350	79240	16320	6290	3650	2900	3650	2740	4400
NPY-8	2.5e-07	NPYR-1	2	21440	9340	10610	24220	29250	27300	23380	21230	19570	18700	18130	17330	16760	15280	13600	11940	10610	9550	8570	8000	7000	6370	5810	5450	4870	4380	4160	3760	3440	3080	2800	315350	60110	23580	13110	6560	6180	5180	4390	3010
NPY-8	1e-07	NPYR-1	2	21330	8670	10150	26220	33760	32370	28910	26760	26510	25630	25180	24420	22120	20000	17930	15910	14000	12160	10750	9700	8800	7530	6480	5970	5290	4690	4080	3800	3580	3100	2750	472810	79850	18980	6860	4560	3340	1790	1470	1820
NPY-8	7.5e-08	NPYR-1	2	24710	11510	10750	25080	32390	30450	27100	25180	25140	25230	24970	24320	22780	20690	18430	16060	14010	12170	10980	9630	8510	7640	6830	6150	5390	4660	4030	3540	2940	2710	2400	522780	84860	19550	8800	4730	4210	3740	3010	2150
NPY-8	5e-08	NPYR-1	2	19740	8900	2260	2390	4190	5470	6010	6000	5580	5770	6560	7090	7650	7680	7340	6900	6240	5650	5410	4920	4610	4270	4090	3720	3550	3340	3160	3070	2810	2730	2610	378930	68080	25840	12100	7870	4930	4370	4030	3780
NPY-8	2.5e-08	NPYR-1	2	26460	10320	3100	6660	12150	13580	12280	10710	10920	11820	13080	14020	13960	13300	12140	11200	10190	9290	8260	7450	6690	6030	5460	4710	4290	3710	3340	2910	2670	2380	2150	529640	89350	20280	8700	4180	2980	2880	3020	2280
NPY-8	2e-08	NPYR-1	2	29010	11060	2240	1370	1980	3080	3350	3170	2840	3010	3360	4090	4690	4670	4480	4140	3920	3580	3430	3210	3000	2660	2440	2310	2110	1900	1780	1610	1490	1270	1180	565410	93630	20940	8210	5720	3640	2540	2250	2400
NPY-8	1e-08	NPYR-1	2	21230	9160	2500	1550	1360	1080	910	770	680	770	730	750	840	890	920	1090	1140	1100	1090	1110	1020	980	940	1010	910	950	810	850	810	830	730	414520	66730	15980	8580	5890	3650	3290	2530	2200
Cell medium	0	NPYR-1	2	23660	8640	2060	1440	1260	990	730	600	470	450	370	380	340	370	310	300	330	350	300	320	320	330	340	320	300	300	300	300	310	300	340	548320	87930	18140	7980	6720	4780	2840	2550	3080
NPY-8	7.5e-09	NPYR-1	2	17000	9570	2880	1290	1070	910	880	930	910	880	920	960	1050	1030	990	1040	960	910	860	910	890	840	780	790	790	680	710	570	610	550	520	560940	91890	17500	6610	5650	4210	4250	2740	2790
NPY-8	5e-09	NPYR-1	2	20180	8920	2260	1320	1150	1040	810	740	600	540	500	470	450	410	480	390	430	410	400	390	410	480	560	570	670	680	750	810	840	900	970	424730	82980	26390	14160	10060	9000	6750	7040	5760
NPY-8	2.5e-09	NPYR-1	2	13090	5720	2210	1610	1340	1270	1200	1050	810	720	600	540	490	480	460	430	460	430	420	430	520	630	660	720	790	770	720	710	770	760	710	419360	69130	18640	9660	7610	8560	8620	9410	9040
NPY-8	2e-09	NPYR-1	2	26720	9580	2700	1390	1030	750	580	520	500	430	380	440	400	330	330	330	350	350	310	310	330	320	340	350	310	310	300	310	300	340	310	553880	89160	19920	6920	4410	3680	3670	3790	3640
NPY-8	1e-09	NPYR-1	2	26670	11550	2660	1360	940	680	550	440	420	390	380	380	340	310	310	310	290	310	300	320	290	350	290	280	300	310	340	290	320	320	260	550850	82610	17350	6490	3670	3990	5300	4920	2700
NPY-8	7.5e-10	NPYR-1	2	17040	7400	1920	1000	910	690	530	540	400	370	350	300	310	320	320	330	310	340	350	380	380	440	420	460	580	780	840	870	860	950	1060	421180	73030	23910	10090	6720	5650	3870	4580	3040
NPY-8	5e-10	NPYR-1	2	17720	8240	2700	1770	1490	1220	990	850	700	600	590	760	470	470	410	390	350	380	370	320	350	370	350	410	400	410	410	480	490	520	450	443150	78680	20250	10900	6870	4520	4010	3780	2770
NPY-8	2.5e-10	NPYR-1	2	19330	7980	1740	940	770	760	670	580	510	460	410	360	690	320	310	300	320	330	310	320	310	320	310	270	320	280	330	280	320	300	340	549490	91960	22290	8560	4910	3920	3470	3170	1850
NPY-8	1e-10	NPYR-1	2	15560	7290	2040	1080	740	630	490	480	390	330	360	330	370	330	330	340	340	380	300	330	310	320	310	280	300	290	280	310	270	240	260	562410	92190	18670	7830	5080	3460	2060	1980	1730
NPY-8	5e-11	NPYR-1	2	17120	9520	2500	1170	780	630	480	410	370	380	310	330	320	320	290	280	260	270	290	260	300	280	280	270	260	260	270	300	250	240	240	564050	89920	17430	6050	3310	2690	2520	2710	1880
NPY-8	1e-11	NPYR-1	2	12770	5750	1240	780	770	600	570	410	350	350	320	300	320	340	280	310	310	310	300	290	280	280	350	310	340	320	350	330	300	330	360	412600	65360	14230	6110	4530	3440	3850	3190	2920
Cell medium	0	NPYR-1	2	10880	6700	2070	1420	1320	1120	1070	870	780	830	750	800	870	930	1010	950	1000	1020	1030	1030	1010	1070	1140	1150	1030	1000	1010	980	810	830	750	474200	82680	19770	9760	5960	5880	5440	6170	6310
NPY-8	1e-05	NPYR-1	2	10280	6600	21640	42750	47070	41660	37090	33940	31580	29760	27350	25320	23500	21530	18840	16630	14390	12470	10920	9720	8330	7550	6650	5880	5190	4580	4110	3520	3100	2710	2350	452700	70950	14060	4960	2370	3120	2720	1920	2460
NPY-8	1e-06	NPYR-1	2	19150	10290	14840	29580	34440	33060	29840	28130	26770	25390	24380	22720	21050	19530	18350	16280	14650	12580	11240	9920	8750	7990	7040	6190	5760	5080	4770	4260	3790	3310	2980	420410	67340	16070	9050	6860	5930	4020	3220	2360
NPY-8	7.5e-07	NPYR-1	2	6620	5900	14960	31370	35280	33160	30090	27970	26830	25750	24880	23060	21200	19280	17360	14940	13120	11660	10410	9270	8160	7370	6450	5710	5060	4440	3930	3600	3200	3040	2660	441680	74300	18850	6890	5000	4070	3040	3400	3750
NPY-8	5e-07	NPYR-1	2	19220	9310	15220	34440	40970	37930	34570	32630	31790	30440	29210	27260	24880	22490	19710	17130	15090	13040	11680	10400	9210	8340	7370	6360	5710	5170	4450	3960	3590	3180	2790	553540	95570	20330	8620	6080	6580	4940	5720	4580
NPY-8	2.5e-07	NPYR-1	2	20180	10640	11360	24740	30690	29990	28060	27050	25840	25310	23380	22180	20410	18020	16310	14170	12500	11230	9870	8630	7700	6970	6140	5440	4800	4440	3890	3460	3120	2810	2660	404490	64720	16480	9030	6640	5070	3900	2940	2730
NPY-8	1e-07	NPYR-1	2	10970	5480	8010	22050	28820	27610	25300	24060	23560	23630	23090	21710	19900	18710	16710	14570	12830	11330	10320	9060	8090	7160	6410	5550	4840	4330	3860	3450	3150	2910	2680	476790	73940	15070	4500	2510	1980	1790	3320	3230
NPY-8	7.5e-08	NPYR-1	2	19480	11430	5770	13680	19670	20940	19470	18170	17960	18430	19050	18400	17500	15840	14030	12680	11180	9820	8900	7920	7060	6400	5640	4950	4580	4060	3660	3060	2880	2710	2370	409450	65430	14440	8000	5010	5090	4980	3410	5010
NPY-8	5e-08	NPYR-1	2	16200	7520	1860	1980	4090	5830	5590	5230	5280	6070	7310	8150	8660	8520	8100	7340	6430	5650	5140	4910	4410	4150	3750	3380	3050	2610	2430	2080	1830	1580	1520	514770	83420	20480	9850	7670	5120	3750	3650	2730
NPY-8	2.5e-08	NPYR-1	2	4440	3220	1040	1550	3050	4340	4650	4530	4340	4370	4780	5100	5380	5510	5290	5060	5120	4780	4540	4120	3680	3470	3190	2970	2740	2510	2270	2100	1970	1890	1710	384670	62120	14150	6120	6580	6940	4430	4490	2980
NPY-8	2e-08	NPYR-1	2	16330	7470	1990	1070	1280	1640	1720	1890	1910	1860	1960	2220	2520	2640	2580	2470	2470	2320	2080	1950	1740	1680	1540	1560	1370	1260	1110	1050	970	880	840	584530	93310	19670	7110	4050	3260	2580	2530	1690
NPY-8	1e-08	NPYR-1	2	11100	6850	1990	1450	1260	980	820	680	520	460	340	350	320	360	400	350	360	400	370	390	350	360	350	310	370	330	340	340	340	300	290	475700	82020	20100	9130	6460	6670	5800	4730	4730
Cell medium	0	NPYR-1	2	13500	6010	1390	760	610	580	500	470	380	370	320	290	280	300	300	290	270	270	270	280	250	250	270	280	280	280	280	300	320	280	290	573660	94290	20960	8120	4130	3800	3170	1860	2610
NPY-8	5e-09	NPYR-1	2	12100	6710	2110	1550	1470	1380	1150	850	700	570	510	510	420	420	340	380	390	340	410	390	370	370	380	370	410	400	410	410	400	370	380	450000	72590	15980	9020	5830	5380	4490	3660	3350
NPY-8	2.5e-09	NPYR-1	2	9790	4790	1270	890	820	600	510	430	390	370	340	340	330	320	320	320	330	300	290	310	300	340	340	340	320	340	320	310	350	310	290	572400	97930	22890	7890	4660	3910	3070	2580	2480
NPY-8	2e-09	NPYR-1	2	12930	6400	1330	720	610	500	420	460	390	350	350	280	300	270	270	270	280	290	330	320	300	300	350	340	330	340	360	380	410	470	460	453780	76200	21480	15260	6830	5050	3680	2540	2070
NPY-8	1e-09	NPYR-1	2	13100	6130	1380	840	760	710	620	470	380	400	400	340	350	340	410	370	370	370	370	310	330	300	340	340	350	340	290	320	320	260	280	531980	85880	17440	6310	5660	3460	2120	2360	3130
NPY-8	7.5e-10	NPYR-1	2	6340	4090	1020	600	540	480	450	380	350	360	270	340	240	290	260	280	290	280	290	210	230	200	210	210	190	220	190	220	230	200	220	354480	56660	14070	7740	4500	3410	3450	3300	2590
NPY-8	5e-10	NPYR-1	2	13990	7610	1860	870	670	590	550	530	490	460	400	380	360	340	320	370	280	290	320	330	250	300	270	270	290	280	260	290	240	270	280	606930	96760	22240	11500	7780	5190	4600	3090	2660
NPY-8	2.5e-10	NPYR-1	2	11380	5410	1180	790	710	630	530	370	350	330	310	270	240	250	260	260	270	280	270	290	260	280	280	330	290	300	280	290	300	330	310	465760	81010	19830	9780	6610	8020	4600	4280	3950
NPY-8	1e-10	NPYR-1	2	13420	6620	1370	740	600	600	510	430	450	340	340	310	310	280	350	270	270	270	300	290	260	300	280	280	360	270	320	310	290	340	280	480200	81790	20780	10860	5640	4890	3050	2890	2910
NPY-8	5e-11	NPYR-1	2	11050	5390	1350	710	720	610	590	570	470	420	430	450	360	360	340	340	300	310	290	300	260	320	280	300	240	290	270	280	290	230	280	433600	65790	15680	7740	5420	4290	3620	2630	3150
NPY-8	1e-11	NPYR-1	2	15370	7420	2120	1320	1010	940	890	720	650	570	490	440	430	380	340	360	330	300	350	310	310	300	330	310	300	280	290	300	280	300	280	494280	78020	16260	6810	5410	4920	3260	3180	3770
Cell medium	0	NPYR-1	2	10240	4930	1620	880	790	750	710	600	570	510	460	510	510	560	470	420	350	360	390	410	420	480	590	560	770	930	920	890	950	860	900	435840	79390	31010	22890	19380	15730	12080	7310	6780
NPY-8	1e-05	NPYR-1	2	10780	5520	12380	26330	32570	31330	28440	26450	25000	23680	22880	21760	20000	18640	16340	14320	12430	11240	9860	8650	7770	6770	6020	5320	4790	4260	3930	3480	3130	2700	2490	371190	67600	21530	11560	8740	7320	5940	4090	3230
NPY-8	1e-06	NPYR-1	2	11910	6920	9830	21530	26280	25650	23570	22110	20970	19810	19170	18250	17100	15940	14500	13190	11190	9770	9060	7940	7180	6250	5730	5130	4500	4020	3560	3150	2770	2540	2170	341440	63380	19620	11300	7530	6660	5170	4460	3720
NPY-8	7.5e-07	NPYR-1	2	16500	9120	16880	34950	40300	38580	35470	33290	31590	30200	28520	26040	23810	21670	19400	16770	14960	12920	11350	10070	8660	7680	6700	6010	5280	4690	4120	3630	3140	2790	2380	517040	92740	22070	9390	6700	6860	4490	3350	3320
NPY-8	5e-07	NPYR-1	2	15380	7090	6510	16600	22210	22920	21220	20440	20130	19760	19440	19010	18070	16710	15480	13970	12520	11290	9850	8590	7830	7200	6470	5660	5040	4690	4320	3750	3300	3050	2740	383630	72580	22400	11640	8130	8450	6030	4910	3830
NPY-8	2.5e-07	NPYR-1	2	5770	3940	7120	18690	25090	25040	23220	21970	21430	20780	19800	19010	17690	16530	14930	13360	11930	10770	9670	8810	8000	7280	6310	5730	5180	4580	4180	3740	3190	2830	2490	335900	61520	16160	7930	5580	4420	3530	2470	2120
NPY-8	1e-07	NPYR-1	2	11290	6210	4160	10460	15740	17920	17630	17620	17750	18010	17800	17280	16160	15260	13850	12580	11250	10090	9020	8100	7360	6400	5560	4900	4510	4020	3580	3210	2840	2570	2350	431010	77790	20740	11340	6640	5820	5590	3640	2930
NPY-8	7.5e-08	NPYR-1	2	13140	6620	4690	12940	19250	19920	18930	18040	18170	18680	18810	18500	18060	16210	15200	13250	12160	10830	10100	9010	8220	7280	6490	5730	5200	4660	4360	3980	3680	3250	2920	467540	81430	20270	7960	4320	3880	3600	3170	2380
NPY-8	5e-08	NPYR-1	2	19110	9160	1840	1250	2170	3340	3470	3340	3230	3350	3700	4150	4480	4650	4570	4320	4100	4040	3660	3530	3290	3140	2940	2630	2500	2430	2270	2140	1930	1750	1610	497480	88880	21970	9890	6250	4070	3980	2500	2070
NPY-8	2.5e-08	NPYR-1	2	18040	8510	2190	2210	4110	5680	5960	5760	5530	5570	6070	6670	7190	7280	6920	6650	6100	5720	5360	4970	4540	4170	3790	3310	3180	2980	2700	2400	2280	2020	1780	506010	83330	19110	9300	6830	5690	5230	5280	4150
NPY-8	2e-08	NPYR-1	2	19210	9240	2430	1310	1180	1240	1300	1150	1220	1200	1240	1220	1260	1360	1380	1440	1560	1540	1550	1420	1410	1450	1370	1330	1220	1190	1180	1060	1050	970	820	492490	85240	21260	10230	5420	4600	3810	6120	5170
NPY-8	1e-08	NPYR-1	2	5810	4110	1330	860	800	810	750	690	610	560	540	480	420	420	380	400	380	410	410	410	420	480	530	580	570	620	590	690	760	740	650	399460	66280	19820	11980	8230	7420	6910	4810	3440
Cell medium	0	NPYR-1	2	4600	3710	2210	1790	1570	1290	1220	1140	1070	910	850	690	620	640	580	550	610	600	740	710	790	810	930	960	1090	1040	1120	1160	1140	1250	1250	410440	77940	24480	17100	16860	17170	16690	12810	9220
NPY-8	7.5e-09	NPYR-1	2	14200	6380	1490	770	600	520	410	430	380	360	330	310	300	330	310	310	340	310	340	290	300	310	320	330	300	280	290	290	320	290	310	537050	86020	16000	5700	3290	2160	1880	2110	1740
NPY-8	5e-09	NPYR-1	2	9440	4940	1180	540	530	470	440	420	380	280	280	300	260	270	290	280	280	330	340	350	370	330	340	410	510	450	530	490	530	570	590	437930	80970	25700	16640	13670	11450	10280	8450	4980
NPY-8	2.5e-09	NPYR-1	2	11880	5800	1730	1110	1010	840	840	680	610	570	460	420	410	400	410	410	400	400	340	400	340	340	340	370	370	360	380	370	400	440	410	434700	80050	23230	11730	7970	5940	6390	5730	4160
NPY-8	2e-09	NPYR-1	2	9990	6230	1850	1000	880	840	760	630	520	480	460	400	440	410	440	460	490	530	500	540	570	630	590	720	810	860	970	1040	920	930	900	522980	84650	19150	8920	6050	5120	4150	3050	2510
NPY-8	1e-09	NPYR-1	2	6220	3390	1260	830	860	930	1040	890	810	770	720	690	660	630	570	480	450	430	410	400	390	360	380	410	390	390	380	400	360	350	420	370960	67520	24290	18580	15350	14130	9480	8280	9240
NPY-8	7.5e-10	NPYR-1	2	7520	4300	1670	1250	1100	880	620	450	340	300	280	260	240	280	290	330	290	300	290	270	300	360	320	350	350	300	330	340	370	320	370	349650	74770	24820	13930	14530	15230	15610	12680	8210
NPY-8	5e-10	NPYR-1	2	9810	5100	1490	970	890	820	710	650	560	480	410	330	330	330	300	260	280	260	250	260	260	270	270	280	260	270	310	400	350	280	280	480760	92380	26780	13670	13800	11150	8640	8590	6250
NPY-8	2.5e-10	NPYR-1	2	14490	7270	1650	890	870	890	740	590	530	440	450	370	330	320	320	300	320	350	280	340	300	320	300	300	310	330	330	380	410	420	450	458320	83670	22770	11950	9820	7330	7200	8160	6010
NPY-8	1e-10	NPYR-1	2	3680	2270	1190	1400	1440	1170	930	650	530	360	350	330	690	490	270	250	280	260	290	300	290	340	290	230	270	290	250	280	260	310	260	346080	64380	18860	11990	10310	8860	6880	4590	2720
NPY-8	5e-11	NPYR-1	2	10890	6980	2260	1540	1320	1150	990	860	710	660	610	570	470	450	490	410	430	420	420	380	400	390	370	390	360	400	420	360	360	370	360	400680	64650	17220	8620	4350	6070	5540	5300	4100
NPY-8	1e-11	NPYR-1	2	16050	8020	1930	1070	1080	910	690	550	450	390	370	340	330	310	320	310	350	350	310	340	320	320	340	330	250	340	330	350	330	360	370	421510	71440	18530	7990	7200	6610	4580	4180	2630
Cell medium	0	NPYR-7	1	1040	770	540	780	980	980	700	470	340	200	180	140	130	100	120	120	120	110	130	130	130	100	80	100	90	140	100	120	110	130	110	23480	4230	1120	680	350	260	270	280	230
NPY-8	1e-05	NPYR-7	1	3070	1180	510	500	400	330	200	180	160	170	130	140	130	150	110	150	130	130	120	130	110	140	110	90	110	120	120	130	100	130	130	34940	6060	1510	650	520	340	330	310	220
NPY-8	5e-06	NPYR-7	1	1570	760	350	290	210	210	160	140	150	150	130	130	140	120	150	110	130	120	140	130	120	110	130	110	120	130	110	110	100	110	120	33100	5990	1720	800	440	360	290	270	280
NPY-8	1e-06	NPYR-7	1	1320	600	550	780	700	450	270	200	210	160	160	110	140	140	120	160	130	130	130	130	120	130	110	120	120	140	130	120	150	110	110	29870	6250	2280	1670	880	810	1320	790	410
NPY-8	5e-07	NPYR-7	1	1050	720	300	230	210	190	180	160	160	180	120	130	130	130	110	120	130	120	140	100	140	130	110	130	120	150	110	140	120	100	100	20540	3280	1070	730	380	330	370	340	360
NPY-8	1e-07	NPYR-7	1	1910	900	290	230	180	200	140	140	130	140	150	100	100	100	120	100	150	120	120	110	90	130	120	90	120	110	120	130	160	110	120	23760	3880	880	490	440	430	450	380	290
NPY-8	5e-08	NPYR-7	1	890	430	370	370	270	170	130	130	150	140	130	120	100	140	130	120	130	120	120	120	150	110	120	120	150	140	130	100	110	130	100	25760	4650	1450	600	480	410	510	470	430
NPY-8	1e-08	NPYR-7	1	890	460	240	280	250	180	200	170	140	130	150	110	120	100	130	130	120	120	100	120	110	110	120	130	100	110	90	110	120	130	110	31030	5110	1570	860	560	390	420	430	550
NPY-8	5e-09	NPYR-7	1	1180	640	380	350	320	210	150	170	130	120	160	100	110	110	120	120	110	130	110	130	100	130	140	120	120	130	120	100	100	90	210	33030	5650	1560	980	830	490	420	370	360
NPY-8	1e-09	NPYR-7	1	1180	480	260	250	200	170	160	140	170	160	140	120	130	130	120	110	140	130	140	140	140	110	110	110	130	120	130	110	130	130	130	27790	4610	1230	590	460	380	310	300	250
NPY-8	5e-10	NPYR-7	1	1100	800	300	210	240	210	170	150	120	120	140	120	150	120	150	110	110	160	100	120	130	130	120	120	140	140	130	110	110	100	100	26990	4100	950	480	470	480	320	270	240
NPY-8	1e-10	NPYR-7	1	660	310	280	340	300	240	190	230	150	120	140	110	130	130	120	140	130	120	140	100	110	130	120	150	100	130	120	110	120	140	110	27680	4450	1430	820	970	650	520	480	410
Cell medium	0	NPYR-7	2	3980	1590	530	430	420	450	390	400	270	270	230	210	200	180	180	170	160	180	150	130	190	180	140	160	170	130	140	140	130	130	130	52010	7920	1900	690	390	360	390	400	330
NPY-8	1e-05	NPYR-7	2	1640	680	380	370	310	200	160	180	150	150	150	170	170	200	160	160	140	170	160	160	170	160	130	160	160	160	130	120	140	150	140	82590	14190	3660	1870	1340	1170	1400	1210	1090
NPY-8	5e-06	NPYR-7	2	810	440	420	420	330	270	200	220	170	190	130	140	180	200	200	170	130	170	130	150	150	170	150	140	150	160	200	150	160	140	130	87360	15380	4360	1780	1040	790	700	720	610
NPY-8	1e-06	NPYR-7	2	2530	840	450	420	350	220	230	250	190	160	160	180	170	180	150	180	170	170	210	190	160	170	170	180	170	140	150	140	160	190	170	75720	12920	3900	3090	2020	1550	1280	880	900
NPY-8	5e-07	NPYR-7	2	1170	520	380	400	290	240	210	190	200	180	190	180	180	190	210	150	150	140	170	170	160	150	150	170	150	170	150	170	140	150	160	59320	11360	3850	2080	1510	1000	890	900	790
NPY-8	1e-07	NPYR-7	2	1650	740	340	270	210	190	180	190	200	170	190	180	170	170	190	170	170	160	220	170	180	160	150	170	180	170	160	160	200	140	190	63480	10900	2800	2130	2020	1130	870	830	880
NPY-8	5e-08	NPYR-7	2	1550	640	380	350	320	220	190	170	180	170	160	170	190	180	160	170	210	150	160	170	170	170	150	160	160	170	160	170	150	170	160	60160	9870	2610	1300	1360	1350	1240	1010	990
NPY-8	1e-08	NPYR-7	2	1680	510	300	390	350	300	260	210	200	210	180	180	160	160	170	150	170	190	190	180	170	140	160	170	150	160	150	170	180	150	180	74100	12730	3150	2190	2090	1290	920	810	860
NPY-8	5e-09	NPYR-7	2	2380	600	370	470	340	270	220	200	220	180	160	180	150	160	170	160	170	170	180	160	160	180	170	160	180	160	150	140	170	190	140	86820	13940	3920	2790	2180	2190	1640	1370	1090
NPY-8	1e-09	NPYR-7	2	3100	790	360	340	250	230	200	230	190	180	160	180	170	140	160	160	140	160	180	160	160	190	160	150	150	140	150	150	140	140	170	96810	15920	4080	1870	1510	1260	1150	1410	1070
NPY-8	5e-10	NPYR-7	2	2270	730	330	360	330	290	220	230	240	190	170	190	150	190	150	170	200	180	170	160	170	180	150	170	240	160	150	150	180	180	150	85570	14470	5010	3610	2980	2450	2000	1590	1280
NPY-8	1e-10	NPYR-7	2	2370	650	340	280	240	220	210	200	210	160	180	190	190	150	180	180	170	210	150	140	150	180	170	180	170	160	220	180	180	200	150	79470	13290	3970	3120	2180	1310	1130	1060	990
Cell medium	0	NPYR-1	1	2440	930	460	540	450	320	250	200	170	160	180	160	160	140	150	150	160	140	130	160	140	150	160	140	130	150	170	180	150	170	140	37530	6310	1670	1150	820	990	830	650	540
NPY-1	1e-05	NPYR-1	1	2790	990	420	290	230	210	170	150	160	150	170	140	170	140	170	140	130	140	180	140	110	170	150	150	130	150	160	140	160	110	130	37890	5860	1430	630	490	530	580	550	380
NPY-1	5e-06	NPYR-1	1	2930	1090	680	650	400	280	220	200	240	180	170	170	160	160	140	150	190	170	350	130	130	140	160	180	140	130	160	160	140	170	130	35810	6350	2020	1080	690	550	770	590	400
NPY-1	1e-06	NPYR-1	1	2660	1260	600	470	320	250	200	170	170	160	140	180	150	120	150	150	140	130	160	150	190	130	150	140	130	130	140	140	160	130	160	34960	5300	1530	1090	750	600	540	440	370
NPY-1	5e-07	NPYR-1	1	3540	1320	460	330	250	200	190	170	140	150	130	160	120	180	120	150	150	150	150	170	150	160	130	140	120	150	140	150	120	180	130	38010	6560	1790	880	600	420	530	710	420
NPY-1	1e-07	NPYR-1	1	3660	1360	480	360	270	260	230	230	180	170	170	180	160	160	130	180	190	190	150	170	180	130	120	150	140	180	140	150	130	130	140	35060	5370	1480	850	830	700	500	410	360
NPY-1	5e-08	NPYR-1	1	2320	940	310	280	230	210	200	190	160	140	150	150	150	160	140	160	160	160	130	170	130	150	150	120	130	120	130	140	160	140	130	35820	5990	2050	1070	690	540	430	450	480
NPY-1	1e-08	NPYR-1	1	2880	1120	400	360	310	240	240	200	190	160	150	170	160	150	160	160	140	140	150	170	160	160	150	150	150	150	180	150	140	150	130	36220	5830	1630	710	530	440	400	370	310
NPY-1	5e-09	NPYR-1	1	2460	920	380	240	190	170	170	150	170	180	160	160	130	160	150	140	160	120	170	140	160	140	150	150	140	160	140	130	130	130	140	35970	5440	1430	830	520	430	400	360	330
NPY-1	1e-09	NPYR-1	1	2070	970	550	440	320	240	210	180	180	160	160	140	140	150	140	130	150	150	140	160	140	160	140	150	160	120	140	140	160	130	140	33510	5180	1470	660	600	590	440	430	460
NPY-1	5e-10	NPYR-1	1	2440	1010	420	280	340	250	220	170	170	180	190	160	150	160	170	150	130	140	160	130	160	150	180	180	150	140	160	130	130	130	130	34750	5120	1430	870	700	800	640	560	450
NPY-1	1e-10	NPYR-1	1	2320	840	330	270	230	240	220	190	200	240	190	190	180	190	150	150	150	130	160	160	170	160	130	180	150	160	130	160	140	160	160	33270	5550	1820	900	620	450	520	390	350
Cell medium	0	NPYR-1	2	1350	370	260	160	130	160	150	150	140	140	130	140	150	150	170	130	150	130	130	140	130	220	150	120	140	110	130	120	170	150	140	28730	4030	1300	820	590	510	490	470	420
NPY-1	1e-05	NPYR-1	2	1240	420	410	960	1180	820	580	540	560	610	720	780	760	740	780	690	650	620	520	470	430	360	360	330	300	330	260	260	230	280	220	32770	5820	1690	910	710	580	660	510	410
NPY-1	5e-06	NPYR-1	2	530	250	220	210	270	230	220	170	190	190	210	220	220	210	220	210	210	220	230	240	230	180	210	190	180	190	180	180	170	160	140	35470	6580	2010	870	700	570	430	360	350
NPY-1	1e-06	NPYR-1	2	1030	360	420	410	320	260	210	190	160	140	190	170	180	140	140	140	140	120	140	160	140	160	110	150	170	130	130	150	120	140	120	33680	5630	1350	970	1060	820	630	670	650
NPY-1	5e-07	NPYR-1	2	2560	690	260	200	200	180	150	130	170	170	140	130	140	140	150	150	180	130	160	150	170	130	150	170	130	140	130	160	150	120	170	30410	4140	860	490	470	460	530	830	700
NPY-1	1e-07	NPYR-1	2	540	260	170	240	210	210	170	130	190	150	140	160	140	160	160	170	140	160	150	130	150	120	160	140	150	150	130	140	140	130	140	33260	5950	1910	970	730	640	520	450	350
NPY-1	5e-08	NPYR-1	2	1070	350	230	210	180	170	170	160	190	160	120	160	170	130	170	170	130	160	140	250	160	180	120	170	140	130	140	140	140	130	130	30090	5270	1610	1190	810	1110	920	490	410
NPY-1	1e-08	NPYR-1	2	970	370	240	250	220	160	230	160	160	150	130	150	180	150	140	150	140	140	140	160	150	130	140	150	160	120	140	170	120	120	150	33660	5980	2470	2080	1800	1480	1110	640	600
NPY-1	5e-09	NPYR-1	2	810	300	180	140	180	160	150	150	170	150	170	130	130	120	150	190	160	140	130	130	150	130	150	130	170	140	130	140	150	180	130	33580	5490	1160	540	620	880	590	490	370
NPY-1	1e-09	NPYR-1	2	580	310	230	230	190	170	160	160	140	150	140	150	140	140	160	180	150	150	130	130	180	160	150	130	130	120	130	160	120	120	140	33430	5080	1510	870	620	590	410	380	360
NPY-1	5e-10	NPYR-1	2	610	260	170	170	140	130	130	130	150	120	150	140	160	130	150	150	150	130	150	150	150	130	130	160	160	120	140	140	150	130	140	37130	6070	1420	990	770	570	460	470	450
NPY-1	1e-10	NPYR-1	2	470	240	220	210	160	140	170	140	130	130	170	140	150	160	140	170	190	160	170	150	150	170	150	130	160	140	180	120	160	140	140	32140	5050	1350	790	690	710	610	630	390
Cell medium	0	empty vector	1	10190	4560	1940	1630	1710	1460	1140	720	480	310	260	210	150	140	120	120	130	120	110	110	110	110	100	120	110	100	100	130	90	90	110	106730	22870	5760	1640	1030	1140	900	680	440
NPY-8	1e-05	empty vector	1	450	680	1230	1280	1010	670	420	280	180	140	150	130	140	120	150	120	100	120	160	130	190	120	110	130	140	130	120	120	100	130	120	163980	33050	8170	2890	1840	860	740	680	940
NPY-8	5e-06	empty vector	1	1910	1420	1310	1140	670	450	250	190	170	140	130	130	120	130	100	120	110	120	110	150	110	110	90	100	110	150	110	120	130	110	100	188090	38700	9900	3110	1130	770	990	960	680
NPY-8	1e-06	empty vector	1	1230	1000	970	910	630	410	220	160	110	140	170	120	140	120	130	150	130	150	110	130	110	130	100	120	120	140	110	130	130	100	100	140860	26400	5420	1690	1090	940	990	840	1060
NPY-8	5e-07	empty vector	1	520	570	640	490	330	190	150	150	140	150	130	130	130	130	150	140	110	110	140	120	140	140	130	100	130	110	130	120	150	140	110	106050	19530	4470	1560	730	680	900	600	540
NPY-8	1e-07	empty vector	1	320	550	760	630	420	310	220	170	150	160	150	150	130	160	150	150	150	140	160	140	160	150	140	130	140	140	150	140	130	140	130	107670	19170	3930	1370	740	590	480	430	410
NPY-8	5e-08	empty vector	1	620	970	470	340	250	220	150	170	130	170	150	170	150	140	150	160	110	130	140	140	140	140	140	120	120	150	120	130	120	120	120	106520	20040	6060	2960	2380	1370	1010	910	690
NPY-8	1e-08	empty vector	1	990	490	470	640	570	370	240	170	160	160	140	110	150	150	140	170	140	130	150	130	120	120	120	130	110	120	130	110	130	130	120	117250	21000	4900	1860	1150	720	550	560	510
NPY-8	5e-09	empty vector	1	1330	700	520	470	310	210	190	160	170	140	140	120	140	390	160	120	100	110	140	150	120	160	150	150	120	130	140	120	130	190	120	153170	28890	6730	3130	2190	1320	750	900	950
NPY-8	1e-09	empty vector	1	3590	1250	590	470	330	280	200	210	180	160	150	130	160	120	120	140	160	110	150	150	150	140	170	120	170	170	130	120	300	120	140	166280	27550	5910	2650	1530	870	1230	1090	570
NPY-8	5e-10	empty vector	1	3530	1380	830	790	520	370	290	230	170	150	160	150	160	170	160	150	160	180	140	160	140	140	120	170	160	140	160	130	140	140	120	150660	27830	7640	2790	1660	1290	890	840	790
NPY-8	1e-10	empty vector	1	1960	880	530	410	370	300	190	200	180	160	170	150	140	160	160	130	140	130	140	150	180	140	140	140	120	150	140	150	160	150	150	134370	21980	5760	2960	2240	1470	1650	1010	880
Cell medium	0	empty vector	2	3450	1410	620	610	590	660	560	460	330	290	210	200	190	190	140	170	180	180	150	140	500	160	150	130	140	120	120	140	130	140	130	83910	17230	4390	1870	1520	1310	1100	990	870
NPY-8	1e-05	empty vector	2	1170	790	650	790	790	620	460	320	240	180	170	210	150	110	130	160	170	150	130	150	140	130	150	130	150	170	120	170	160	120	150	115610	21030	5060	2280	1260	1330	870	790	690
NPY-8	5e-06	empty vector	2	2010	980	740	860	710	470	300	220	220	160	170	160	180	180	150	170	150	130	130	150	150	150	160	160	150	150	150	160	150	140	120	115530	22390	5480	1950	1180	920	1460	1140	790
NPY-8	1e-06	empty vector	2	2560	1120	730	710	470	290	260	210	210	190	160	190	160	170	150	170	160	180	130	150	170	120	140	150	170	110	150	150	130	190	140	105620	19770	6090	2640	2060	1600	1130	870	710
NPY-8	5e-07	empty vector	2	2850	1000	530	390	280	200	200	180	180	170	160	160	160	160	160	170	160	150	150	150	130	190	150	220	170	160	120	130	130	140	160	84320	14570	3410	1530	1120	1060	780	930	890
NPY-8	1e-07	empty vector	2	2180	1090	540	370	290	220	220	150	160	160	160	170	160	180	180	180	200	150	170	170	160	150	130	160	150	120	170	160	160	200	160	81890	12780	3100	1660	930	840	870	980	1060
NPY-8	5e-08	empty vector	2	1720	920	470	320	250	240	220	250	260	170	220	200	180	170	230	210	150	180	210	180	190	160	150	160	200	170	140	180	150	170	170	81100	13930	3280	1280	1780	1270	960	690	730
NPY-8	1e-08	empty vector	2	2870	980	380	300	210	160	170	140	150	180	200	140	160	150	160	170	150	140	150	140	190	120	170	130	160	140	180	160	160	180	130	87950	15780	3910	1960	2020	1630	1370	1090	870
NPY-8	5e-09	empty vector	2	3190	1060	360	310	280	230	210	210	170	150	200	190	150	160	180	190	150	150	190	140	140	150	140	210	170	200	160	170	150	120	170	115760	18980	4450	2080	1610	1240	880	1050	990
NPY-8	1e-09	empty vector	2	3390	1130	370	220	280	250	190	150	170	170	150	170	150	180	180	140	160	190	190	150	170	160	170	150	180	190	160	160	150	160	160	109830	17960	4690	3080	1790	1420	1230	1020	1070
NPY-8	5e-10	empty vector	2	5090	1610	440	370	340	270	170	170	170	200	180	170	160	170	170	190	210	160	180	180	170	170	150	180	190	170	160	150	170	160	170	105490	16490	3960	1940	1710	2130	1940	1420	1080
NPY-8	1e-10	empty vector	2	5870	1860	510	550	490	420	290	240	250	220	200	200	170	170	180	180	170	170	160	190	160	160	170	170	180	160	150	170	170	160	130	93060	15160	4260	2950	2300	2420	1630	1170	980

## Sheet: Fig 3E-G
		Developmental stage
Number of..	..that..	Adult
npyr-1+ cells	are pc2+	28/30
npyr-1+ cells	are ChAT+	0/30
npyr-1+ cells	are npy-8+	0/30
npy-8+ cells*	are npyr-1+	0/30
* Only npy-8+ cells near the cephalic ganglia were analyzed. npy-8 is also expressed in peripheral neurons that were not counted.

## Sheet: Fig 5A
				Developmental features
Experiment	Gene	Clone	RNAi paradigm	Gonopore (live)	Mature testes	Mature ovaries	Sperm in seminal vesicles
1	Control*	n/a	Innate development	5/5	5/5	5/5	5/5
2	Control*	n/a	Innate development	5/5	5/5	5/5	5/5
3	Control*	n/a	Innate development	5/5	5/5	5/5	5/5
1		GCR004	Innate development	5/5	5/5	5/5	5/5
1		GCR007	Innate development	5/5	5/5	5/5	5/5
1		GCR042	Innate development	5/5	5/5	5/5	5/5
1		GCR046	Innate development	5/5	5/5	5/5	5/5
1		GCR051	Innate development	5/5	5/5	5/5	5/5
1		GCR106	Innate development	5/5	5/5	5/5	5/5
1		GCR108	Innate development	5/5	5/5	5/5	5/5
1		GCR123	Innate development	5/5	5/5	5/5	5/5
1		GCR124	Innate development	5/5	5/5	5/5	5/5
1		GCR125	Innate development	5/5	5/5	5/5	5/5
1		GCR126	Innate development	5/5	5/5	5/5	5/5
1		GCR127	Innate development	5/5	5/5	5/5	5/5
1		GCR128	Innate development	5/5	5/5	5/5	5/5
1		GCR129	Innate development	5/5	5/5	5/5	5/5
1		GCR130	Innate development	5/5	5/5	5/5	5/5
1		GCR131	Innate development	5/5	5/5	5/5	5/5
1		GCR132	Innate development	5/5	5/5	5/5	5/5
1		GCR133	Innate development	5/5	5/5	5/5	5/5
1		GCR134	Innate development	5/5	5/5	5/5	5/5
1		GCR135	Innate development	5/5	5/5	5/5	5/5
1		GCR136	Innate development	5/5	5/5	5/5	5/5
1		GCR137	Innate development	5/5	5/5	5/5	5/5
1		GCR138	Innate development	5/5	5/5	5/5	5/5
1		GCR139	Innate development	5/5	5/5	5/5	5/5
1		GCR141	Innate development	5/5	5/5	5/5	5/5
1		GCR142	Innate development	5/5	5/5	5/5	5/5
1		GCR143	Innate development	5/5	5/5	5/5	5/5
1		GCR144	Innate development	5/5	5/5	5/5	5/5
1		GCR145	Innate development	5/5	5/5	5/5	5/5
1		GCR146	Innate development	5/5	5/5	5/5	5/5
1	Smed-ophis	GCR147	Innate development	0/5	0/5	0/5	0/5
2	Smed-ophis	GCR147	Innate development	2/5	0/5	0/5	0/5
3	Smed-ophis	GCR147	Innate development	0/5	0/5	0/5	0/5
1		GCR148	Innate development	5/5	5/5	5/5	5/5
1		GCR149	Innate development	5/5	5/5	5/5	5/5
1		GCR150	Innate development	5/5	5/5	5/5	5/5
1		GCR152	Innate development	5/5	5/5	5/5	5/5
1		GCR154	Innate development	5/5	5/5	5/5	5/5
* Bacterial ccdB and camR-containing insert of pJC53.2

## Sheet: Fig 7C-F
		Developmental stage
Number of..	..that..	1-week regen.	2-week regen.	Hatchling	Juvenile	Adult
worms	have dorsal dmd-1+ cells	8/10	10/10	10/10	10/10	5/5
worms	have ophis+ cells	5/10	10/10	10/10	10/10	5/5
worms	have nanos+ cells	2/10	10/10	8/10	10/10	5/5
dorsal dmd-1+ cells	are ophis+	13/30*	20/30	24/30	22/30	21/30
testis dmd-1+ cells	are ophis+	n/a**	n/a**	n/a**	19/19	21/21
dorsal non-testis dmd-1+ cells	are ophis+	13/30*	20/30	24/30	3/30	0/30
ophis+ cells	are dmd-1+	30/30	30/30	30/30	30/30	30/30
ophis+ cells	have nanos+ cells nearby	4/10***	21/30	25/30***	28/30	30/30
nanos+ clusters	have dmd-1+ cells nearby	10/10	30/30	30/30	30/30	30/30
nanos+ clusters	have ophis+ cells nearby	9/10	27/30	30/30	30/30	30/30
* Only worms with ophis+ cells were analyzed.
** Do not have lobular testis structures.
*** Only worms with nanos+ cells were analyzed.

## Sheet: qPCR data
Raw data related to S3D and S5B
Sample	Target	Ct (mean)	dCt	dCt (mean)	ddCt (mean)	RQ to control	SEM
Ase-1	bTub	24.0877
Ase-2	bTub	21.3163
Ase-3	bTub	22.6398
Ase-4	bTub	21.8329
Hat-1	bTub	21.3569
Hat-2	bTub	21.4777
Hat-3	bTub	21.6804
Hat-4	bTub	21.4698
Sex-1	bTub	21.9521
Sex-2	bTub	20.8435
Sex-3	bTub	21.276
Sex-4	bTub	21.3751
Ase-1	npy-8	35.3824	11.2947	11.8964	0	1	0.245446
Ase-2	npy-8	33.8055	12.4892
Ase-3	npy-8	34.4718	11.832
Ase-4	npy-8	33.8026	11.9698
Hat-1	npy-8	27.9363	6.57942	6.38473	-5.5117	45.6234	0.124554
Hat-2	npy-8	28.0709	6.59312
Hat-3	npy-8	27.755	6.07456
Hat-4	npy-8	27.7616	6.29183
Sex-1	npy-8	27.6207	5.66854	6.26381	-5.63262	49.6121	0.244813
Sex-2	npy-8	27.6779	6.83441
Sex-3	npy-8	27.6918	6.41573
Sex-4	npy-8	27.5117	6.13657
Ase-1	npyr-1	31.1894	7.10177	6.95443	0	1	0.107578
Ase-2	npyr-1	28.4862	7.16995
Ase-3	npyr-1	29.4622	6.82245
Ase-4	npyr-1	28.5564	6.72356
Hat-1	npyr-1	28.8932	7.53635	7.20318	0.248744	0.841629	0.17375
Hat-2	npyr-1	28.9463	7.46856
Hat-3	npyr-1	28.6134	6.93295
Hat-4	npyr-1	28.3446	6.87484
Sex-1	npyr-1	28.9541	7.00201	7.53022	0.57579	0.670919	0.224709
Sex-2	npyr-1	28.868	8.02442
Sex-3	npyr-1	29.0259	7.74985
Sex-4	npyr-1	28.7197	7.3446
Ase-1	ophis	31.6989	7.61125	7.6236	0	1	0.132653
Ase-2	ophis	29.2101	7.89382
Ase-3	ophis	29.9056	7.26581
Ase-4	ophis	29.5563	7.7235
Hat-1	ophis	28.9528	7.59587	7.20382	-0.419774	1.33772	0.197683
Hat-2	ophis	28.7108	7.23306
Hat-3	ophis	28.3377	6.65729
Hat-4	ophis	28.7988	7.32907
Sex-1	ophis	27.2743	5.32214	5.49035	-2.13325	4.38703	0.185648
Sex-2	ophis	26.8406	5.99706
Sex-3	ophis	26.4084	5.13237
Sex-4	ophis	26.885	5.50983
Raw data related to S3C*
BioReplicates	Target	Ct (mean)	dCt	dCt (mean)	ddCt (mean)	RQ to control	SEM
control RNAi-1	bTub	20.2846
control RNAi-2	bTub	20.2512
npyr-1 RNAi	bTub	19.9594
npyr-1 RNAi-2	bTub	20.0959
npy-8 RNAi-1	bTub	20.6106
npy-8 RNAi-2	bTub	20.4231
control RNAi-1	npyr-1	27.6869	7.40226	7.49603	0	1	0.093769
control RNAi-2	npyr-1	27.841	7.58979
npyr-1 RNAi-1	npyr-1	30.1341	10.1747	10.0396	2.54356	0.171519	0.135111
npyr-1 RNAi-2	npyr-1	30.0004	9.90447
npy-8 RNAi-1	npyr-1	27.9121	7.30147	7.20034	-0.295688	1.22747	0.101129
npy-8 RNAi-2	npyr-1	27.5223	7.09921
control RNAi-1	npy-8	25.678	5.39334	5.52343	0	1	0.130087
control RNAi-2	npy-8	25.9047	5.65351
npyr-1 RNAi-1	npy-8	25.3176	5.35815	5.46667	-0.0567575	1.04013	0.108521
npyr-1 RNAi-2	npy-8	25.6711	5.57519
npy-8 RNAi-1	npy-8	28.3183	7.70769	7.60733	2.0839	0.235876	0.100368
npy-8 RNAi-2	npy-8	27.9301	7.50696
control RNAi-1	nanos	26.0691	5.7845	5.95635	0	1	0.171854
control RNAi-2	nanos	26.3794	6.12821
npyr-1 RNAi-1	nanos	25.4121	5.45272	5.63612	-0.320234	1.24853	0.183405
npyr-1 RNAi-2	nanos	25.9154	5.81952
npy-8 RNAi-1	nanos	26.47	5.85941	5.75962	-0.196736	1.1461	0.0997905
npy-8 RNAi-2	nanos	26.0829	5.65983
* Two biological replicates analyzed by qPCR for each RNAi treatment.
